# Supplementary material for: Monopyrrolotetrathiafulvalene–succinamide conjugates and their TCNQ charge transfer complex based supramolecular gels with multiple stimulus responsiveness
Source: Royal Society of Chemistry journal article supplement (doi:10.1039/c4ob01397b), 2014-07-15
Supplement: c4ob01397b1.pdf [file c4ob01397b1.pdf]

**Monopyrrolotetrathiafulvalene and their TCNQ charge-transfer complex based supramolecular gels with multiple stimulus responsiveness**

*Supporting Information*

*Yucun Liu, Ningjuan Zheng, Tie Chen, Longyi Jin and Bingzhu Yin\**

[zqcong@ybu.edu.cn](mailto:zqcong@ybu.edu.cn)

Key Laboratory for Natural Resources of Changbai Mountain  
& Functional Molecules of Ministry of Education and Department of  
Chemistry, Yanbian University, Yanji, Jilin 133002 (China)  
Fax: +86 433 2732456; Tel: +86 433 2732298

## **1. Instrumentation**

### **Gelation study**

A weight amount of the gelator **1** with or without TCNQ adding a measured volume of the solvent were placed in a sealed test tube and made a clear solution by heating. And then, the system left at room temperature. The transition temperatures ( $T_{\text{gel}}$ ) were determined by ball-drop method.

### **NMR experiments**

All solution state NMR studies were carried out on Bruker AV-300 Spectrometer (300 MHz for  $^1\text{H}$  and 75 MHz for  $^{13}\text{C}$ ) and chemical shifts were referenced relative to tetramethylsilane ( $\delta_{\text{H}}/\delta_{\text{C}}=0$ ).

### **FT-IR spectroscopy**

IR spectra were recorded on a Shimadzu FT-IR Prestige-21 instrument with the KBr disk technique.

### **MALDI-TOF-MS spectrometry**

Mass spectra were performed on a Shimadzu Axima CFR<sup>TM</sup> Plus using a 1,8,9-anthracenetriol (DITH) and  $\beta$ -phenylacrylic acid (CHCA) matrix.

### **ESI-MS spectrometry**

The high-resolution mass spectra were obtained using a Bruker microTOF II focus spectrometer (ESI).

### **Cyclic voltametry**

Cyclic voltammetry was performed with CHI660D instruments in a mixture of  $\text{CH}_3\text{CN}/\text{CH}_2\text{Cl}_2$  (1:1, 1 mM) with 0.1 M  $\text{Bu}_4\text{NPF}_6$  as the supporting electrolyte and a scan rate of  $100 \text{ mVs}^{-1}$ . Counter and working electrodes were made of Pt and glass carbon, respectively, and an Ag/AgCl was used as the reference electrode. A small amount of the gel or CT gel was carefully put on the glass carbon electrode, which was left in air for 24h.

### **UV-vis spectroscopy**

UV-vis spectra were recorded on a Hitachi U-3010 spectrophotometer.

### **Thermogravimetric analysis**

Thermogravimetric analysis (TGA) curve was measured by DTG60 at a heating rate of  $10 \text{ }^\circ\text{C min}^{-1}$  under  $\text{N}_2$  atmosphere.

## Field emission scanning electron microscopy

The gel samples were placed on silicon wafer, and dried for 24h under room temperature before imaging. A layer of gold was sputtered on top to form a conducting surface and finally the specimen was transferred into the Field Emission Scanning Electron Microscope (FE-SEM, Joel Scanning Microscope-JSM-6700F and Hitachi Scanning Microscope-3500N).

## Small-angle X-ray scattering

Small-angle X-ray scattering (SAXS) measurements were carried out at 298 K on a beamline 1W2A synchrotron radiation X-ray small angle system at Beijing Synchrotron Radiation Facility( $\lambda = 1.54\text{\AA}$ ).

## Electron paramagnetic resonance (EPR) spectroscopy

The EPR spectra were obtained on a JES-FA 200 EPR spectrometer. The instrumental parameters were as follows: scanning frequency, 9.45 GHz; central field, 3371.44 G; scanning width, 8000 G; scanning power, 0.998 mW; scanning temperature, 25 °C.

## 2. Synthesis and characterization of organic compounds

All solvents were purified and dried according to literature methods. The compound **6** was synthesized according to the literature procedure.<sup>1</sup>

**2-(4,5-bis(butylthio)-1,3-dithiol-2-ylidene)-5-(3-bromopropyl)-5H-[1,3]dithiolo[4,5-c]pyrrole (5):** Compound **6** (311.3 mg, 0.7417 mmol) and NaH (106.8 mg, 4.4502 mmol) were suspended in anhyd DMF (8.0 mL) and degassed (N<sub>2</sub>, 20 min). Then, 1, 3-Dibromopropane was added in one portion. The reaction mixture was stirred for 3.0 h at room temperature. After addition of saturated brine (20 mL), the mixture was extracted with CH<sub>2</sub>Cl<sub>2</sub>, and the extract was washed with brine and dried (MgSO<sub>4</sub>). After concentration, the resulting crude product was purified through flash column chromatography (silica gel, dichloromethane/ petroleum ether, v: v=1:6) to give 337.2 mg (84.0%) of **5** as yellow oil. <sup>1</sup>H NMR (300MHz, CDCl<sub>3</sub>)  $\delta$  0.92 (t, *J* = 6.0Hz, 6H), 1.37-1.49 (m, 4H), 1.57-1.67 (m, 4H), 2.17-2.25 (m, 2H), 2.83 (t, *J* = 6.0Hz, 4H), 3.31 (t, *J* = 6.0Hz, 2H), 4.04 (br, 2H), 6.50 (s, 2H); <sup>13</sup>C NMR(75MHz, CDCl<sub>3</sub>)  $\delta$  128.35, 127.48, 119.33, 112.56, 48.13, 35.98, 33.94,

31.80, 30.01, 21.69, 13.66; MALDI-TOF MS  $m/z$  Calcd for  $C_{21}H_{30}BrNS_6$ : 538.96. Found: 538.52 ( $[M]^+$ , 100).

**5-(3-azidopropyl)-2-(4,5-bis(butylthio)-1,3-dithiol-2-ylidene)-5H-[1,3]dithiolo[4,5-c]pyrrole (4):** Compound **5** (337.2 mg, 0.6236 mmol) and  $NaN_3$  (608.2 mg, 9.39 mmol) were suspended in anhyd DMF (11.0 mL), then stirred and heated to 90 °C react for 12.0 h. After addition of saturated brine (50 mL), the mixture was extracted with  $CH_2Cl_2$ , and the extract was washed with brine and dried ( $MgSO_4$ ). After concentration, the resulting crude product was purified through flash column chromatography (silica gel, dichloromethane/ petroleum ether, v: v=1:3) to give 286.2 mg (91.0%) of **4** as yellow oil.  $^1H$  NMR (300MHz,  $CDCl_3$ )  $\delta$  0.92 (t,  $J = 6.0$ Hz, 6H), 1.37-1.49 (m, 4H), 1.56-1.66 (m, 4H), 1.90-1.99 (m, 2H), 2.82 (t,  $J = 6.0$ Hz, 4H), 3.26 (t,  $J = 6.0$ Hz, 2H), 3.94 (br, 2H), 6.50 (s, 2H);  $^{13}C$  NMR(75MHz,  $CDCl_3$ )  $\delta$  127.47, 119.65, 119.31, 112.51, 111.14, 47.97, 47.33, 35.96, 31.80, 30.60, 21.68, 13.64; MALDI-TOF MS  $m/z$  Calcd for  $C_{19}H_{26}N_4S_6$ : 502.05. Found: 501.65 ( $[M]^+$ , 100).

**3-(2-(4,5-bis(butylthio)-1,3-dithiol-2-ylidene)-5H[1,3]dithiolo[4,5-c]pyrrol-5-yl)propan-1-amine (3):** Compound **4** (286.2 mg, 0.5692 mmol) and  $PPh_3$  (328.4 mg, 1.1384 mmol) were dissolved in THF (14.0 mL),  $H_2O$  (102.5  $\mu$ L, 5.6920 mmol) was added to this solution. The mixture was stirred and heated to 45 °C react, after 17.0 h the reaction mixture was concentrated. Purification of the product was conducted by flash column chromatography (silica gel, dichloromethane/ methanol, v: v=20:1) to give 255.7 mg (94.2%) of **3** as orange-yellow solid.  $^1H$  NMR (300MHz,  $CDCl_3$ )  $\delta$  0.92 (t,  $J = 6.0$ Hz, 6H), 1.37-1.49 (m, 4H), 1.56-1.66 (m, 4H), 1.90-1.99 (m, 2H), 2.74 (t,  $J = 6.0$ Hz, 2H), 2.82 (t,  $J = 6.0$ Hz, 4H), 3.21 (br, 2H), 3.94 (br, 2H), 6.50 (s, 2H);  $^{13}C$  NMR(75MHz,  $CDCl_3$ )  $\delta$  127.45, 119.69, 118.85, 112.56, 110.82, 48.03, 38.53, 35.95, 33.71, 31.71, 21.68, 13.58. MALDI-TOF MS  $m/z$  Calcd for  $C_{19}H_{28}N_2S_6$ : 476.06. Found: 476.03 ( $[M]^+$ , 100).

**4-((3-(2-(4,5-bis(butylthio)-1,3-dithiol-2-ylidene)-5H-[1,3]dithiolo[4,5-c]pyrrol-5-yl)propyl)amino)-4-oxobutanoic acid (2):** Compound **3** (189.4 mg, 0.3972 mmol) and  $N,N$ -Diisopropylethylamine (138.3  $\mu$ L, 0.7944 mmol) were dissolved in  $CH_2Cl_2$  (10.0 mL). Under stirring, Succinic anhydride (198.6 mg, 1.9860 mmol) was dropped in the solution, overnight. The reaction mixture was concentrated, and Purification of the product was conducted by flash column chromatography (silica gel, dichloromethane/ methanol, v: v=20:1) to give 181.7 mg (81.3%) of **2** as yellow solid.  $^1H$  NMR (300MHz,  $CDCl_3$ )  $\delta$  0.92 (t,  $J = 6.0$ Hz, 6H), 1.37-1.49 (m, 4H), 1.63 (br, 4H), 1.86 (br, 2H), 2.42 (br, 2H), 2.64 (br, 2H), 2.90 (br, 4H), 3.20 (br, 2H), 6.16 (br, 1H), 6.50 (br, 2H), 8.83 (br, 1H);  $^{13}C$  NMR(75MHz,  $CDCl_3$ )  $\delta$  176.74, 172.94, 37.12, 31.98, 31.71,

30.60, 29.58, 21.71, 13.67; MALDI-TOF MS  $m/z$  Calcd for  $C_{23}H_{32}N_2O_3S_6$ : 576.07. Found: 575.73 ( $[M]^+$ , 100).

***N*<sup>l</sup>-(3-(2-(4,5-bis(butylthio)-1,3-dithiol-2-ylidene)-5*H*-[1,3]dithiolo[4,5-*c*]pyrrol-5-yl) propyl)-*N*<sup>l</sup>-butylsuccinamide (1a)**: Compound **2** (181.7 mg, 0.3230 mmol), EDCI (120.8 mg, 0.6460 mmol), HOBT (85.2 mg, 0.6460 mmol) and *n*-Butylamine (61.4  $\mu$ L, 0.6460 mmol) were dissolved in  $CH_2Cl_2$  (10.0 mL) and stirred for 8.0 h at room temperature. The reaction mixture was poured into 50 mL water. The organic layer was dried with  $MgSO_4$ . After concentration, the crude product was purified through flash column chromatography (silica gel, dichloromethane/methanol, v: v=100:1) to give 158.5 mg (77.7%) of **1a** as yellow solid. m.p.: 142.5  $^{\circ}C$ ;  $^1H$  NMR (300MHz,  $CDCl_3$ )  $\delta$ 0.89-0.94 (m, 9H), 1.25-1.52 (m, 10H), 1.57-1.67 (m, 4H), 1.87-1.96 (m, 2H), 2.46 (br, 4H), 2.83 (br, 4H), 3.23 (q,  $J = 6.0$ Hz, 4H), 5.85 (br, 1H), 6.33 (br, 1H), 6.50 (s, 2H);  $^{13}C$  NMR(75MHz,  $CDCl_3$ )  $\delta$ 172.70, 172.25, 127.52, 119.09, 112.50, 48.10, 39.84, 36.75, 36.02, 31.84, 29.71, 29.42, 27.05, 22.75, 21.72, 14.18, 13.66; MALDI-TOF MS  $m/z$  Calcd for  $C_{27}H_{41}N_3O_2S_6$ : 631.15. Found: 630.79 ( $[M]^+$ , 100).

***N*<sup>l</sup>-(3-(2-(4,5-bis(butylthio)-1,3-dithiol-2-ylidene)-5*H*-[1,3]dithiolo[4,5-*c*]pyrrol-5-yl)propyl)-*N*<sup>l</sup>-octylsuccinamide (1b)**: This compound was prepared in a fashion similar to **1a**. Yield: 58.6%. m.p.: 131.4  $^{\circ}C$ ;  $^1H$  NMR (300MHz,  $CDCl_3$ )  $\delta$ 0.86-0.94 (m, 9H), 1.27 (br, 10H), 1.40-1.49 (m, 6H), 1.58-1.68 (m, 6H), 1.88-1.96 (m, 2H), 2.50 (br, 4H), 2.84 (br, 4H), 3.22 (q,  $J = 6.0$ Hz, 4H), 5.84 (br, 1H), 6.32 (br, 1H), 6.51 (s, 2H);  $^{13}C$  NMR(75MHz,  $CDCl_3$ )  $\delta$ 172.74, 172.22, 39.92, 36.76, 31.94, 31.73, 29.72, 29.58, 29.37, 29.32, 26.95, 22.70, 21.82, 14.13, 13.63; MALDI-TOF MS  $m/z$  Calcd for  $C_{27}H_{41}N_3O_2S_6$ : 687.40. Found: 687.21 ( $[M]^+$ , 100).

***N*<sup>l</sup>-(3-(2-(4,5-bis(butylthio)-1,3-dithiol-2-ylidene)-5*H*-[1,3]dithiolo[4,5-*c*]pyrrol-5-yl)propyl)-*N*<sup>l</sup>-dodecylsuccinamide (1c)**: This compound was prepared in a fashion similar to **1a**. Yield: 83.4%. m.p.: 130.7  $^{\circ}C$ ;  $^1H$  NMR (300MHz,  $CDCl_3$ )  $\delta$ 0.86-0.94 (m, 9H), 1.25 (br, 20H), 1.37-1.49 (m, 6H), 1.60-1.64 (m, 4H), 1.89-1.97 (m, 2H), 2.50 (br, 4H), 2.84 (t,  $J = 3.0$ Hz, 4H), 3.21 (q,  $J = 6.0$ Hz, 4H), 5.95 (br, 1H), 6.12 (br, 1H), 6.51 (s, 2H);  $^{13}C$  NMR(75MHz,  $CDCl_3$ )  $\delta$ 172.84, 172.38, 127.65, 119.22, 112.63, 48.23, 39.98, 36.88, 36.15, 32.11, 31.98, 31.92, 29.87, 29.84, 29.79, 29.55, 27.18, 22.88, 21.85, 14.32, 13.79; MALDI-TOF MS  $m/z$  Calcd for  $C_{27}H_{41}N_3O_2S_6$ : 743.5. Found: 744.2 ( $[M]^+$ , 100).

***N*<sup>l</sup>-(3-(2-(4,5-bis(butylthio)-1,3-dithiol-2-ylidene)-5*H*-[1,3]dithiolo[4,5-*c*]pyrrol-5-yl)propyl)-*N*<sup>l</sup>-hexadecylsuccinamide (1d)**: This compound was prepared in a fashion similar to **1a**. Yield: 64.8%. m.p.: 130.1  $^{\circ}C$ ;  $^1H$  NMR (300MHz,  $CDCl_3$ )  $\delta$ 0.87-0.96 (m, 9H), 1.26 (br, 28H), 1.39-1.48 (m, 6H), 1.63 (br, 4H), 1.93 (br, 2H), 2.52 (br, 4H), 2.88 (br, 2H), 3.14-3.27 (m, 4H), 5.79 (br, 1H), 6.29 (br, 1H), 6.54 (s, 2H);  $^{13}C$  NMR(75MHz,  $CDCl_3$ )  $\delta$ 172.76, 172.24, 48.44, 39.98, 36.83, 31.98,

29.76, 29.67, 29.63, 29.58, 29.41, 29.37, 26.99, 22.74, 21.76, 14.17, 13.66; MALDI-TOF MS  $m/z$  Calcd for  $C_{27}H_{41}N_3O_2S_6$ : 799.7. Found: 800.3 ( $[M]^+$ , 100).

***N*'-(3-(2-(4,5-bis(butylthio)-1,3-dithiol-2-ylidene)-5*H*-[1,3]dithiolo[4,5-*c*]pyrr-ol-5-yl)propyl)-*N*'-octadecylsuccinamide (1e)**: This compound was prepared in a fashion similar to **1a**. Yield: 71.4%. m.p.:129.9 °C;  $^1H$  NMR (300MHz,  $CDCl_3$ )  $\delta$ 0.86-0.94 (m, 9H), 1.25 (br, 30H), 1.37-1.40 (m, 6H), 1.60-1.67 (m, 6H), 1.89-1.96 (m, 2H), 2.49 (br, 4H), 2.85 (br, 4H), 3.21 (q,  $J = 6.0$ Hz, 4H), 5.80 (br, 1H), 6.31 (br, 1H), 6.51 (s, 2H);  $^{13}C$  NMR(75MHz,  $CDCl_3$ )  $\delta$ 172.88, 172.33, 127.26, 118.20, 108.67, 43.15, 40.03, 36.98, 36.05, 32.05, 31.84, 31.70, 29.83, 29.70, 29.64, 29.48, 29.43, 27.05, 22.81, 21.91, 14.25, 13.75; MALDI-TOF MS  $m/z$  Calcd for  $C_{27}H_{41}N_3O_2S_6$ : 827.6. Found: 828.4 ( $[M]^+$ , 100).

### 3. Gelation tests

**Table S1** Gelation properties of **1** in various solvents.

| Solvents         | <b>1a</b> <sup>a</sup> | CGC <sup>b</sup> | <b>1b</b> | CGC | <b>1c</b> | CGC | <b>1d</b> | CGC | <b>1e</b> | CGC |
|------------------|------------------------|------------------|-----------|-----|-----------|-----|-----------|-----|-----------|-----|
| Cyclohexane      | TG                     | 1.0              | OG        | 2.5 | P         | —   | P         | —   | P         | —   |
| MCH              | OG                     | 1.1              | P         | —   | PG        | —   | P         | —   | P         | —   |
| <i>n</i> -Hexane | IS                     | —                | IS        | —   | IS        | —   | IS        | —   | IS        | —   |
| <i>n</i> -Octane | IS                     | —                | IS        | —   | P         | —   | P         | —   | P         | —   |
| EtOAc            | S                      | —                | S         | —   | P         | —   | P         | —   | P         | —   |
| $CH_2Cl_2$       | S                      | —                | S         | —   | S         | —   | S         | —   | S         | —   |
| $CHCl_3$         | S                      | —                | S         | —   | S         | —   | S         | —   | S         | —   |
| $CCl_4$          | S                      | —                | S         | —   | S         | —   | S         | —   | S         | —   |
| Benzene          | S                      | —                | S         | —   | S         | —   | S         | —   | S         | —   |
| Toluene          | S                      | —                | S         | —   | P         | —   | P         | —   | P         | —   |
| DMSO             | S                      | —                | S         | —   | S         | —   | P         | —   | P         | —   |
| DMF              | S                      | —                | S         | —   | S         | —   | S         | —   | S         | —   |
| THF              | S                      | —                | S         | —   | S         | —   | S         | —   | S         | —   |
| Methanol         | P                      | —                | P         | —   | P         | —   | P         | —   | P         | —   |
| Ethanol          | S                      | —                | S         | —   | P         | —   | P         | —   | P         | —   |
| $CH_3CN$         | P                      | —                | P         | —   | P         | —   | P         | —   | P         | —   |

<sup>a</sup>TG = transparent gel; OG = opaque gel; P = precipitation; S = soluble; IS = insoluble;

PG = partial gel

<sup>b</sup>CGC = the critical gelation concentrations (mg/mL) at room temperature.

#### 4. Image of gel-sol transition

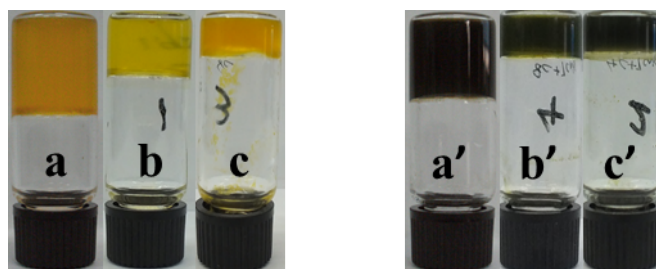

**Figure S1** The photographs of gelators (a) **1a** in cyclohexane, (b) **1a** in MCH, (c) **1b** in cyclohexane and corresponding to the CT complex gels a', b' and c', respectively.

#### 5. $T_{gel}$ of CT complex gel

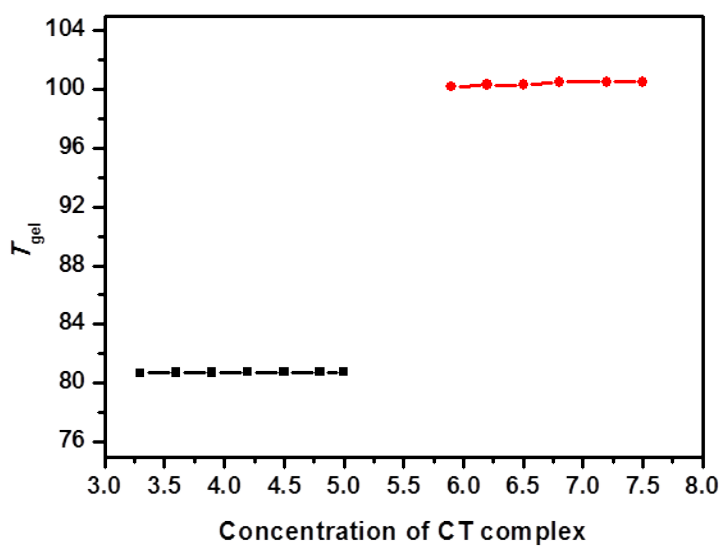

**Figure S2** Plots of  $T_{gel}$  versus the concentration of CT complex (**1a** : TCNQ = 1 : 1, mole ratio) in cyclohexane (■) and MCH (●).

## 6. TGA curves

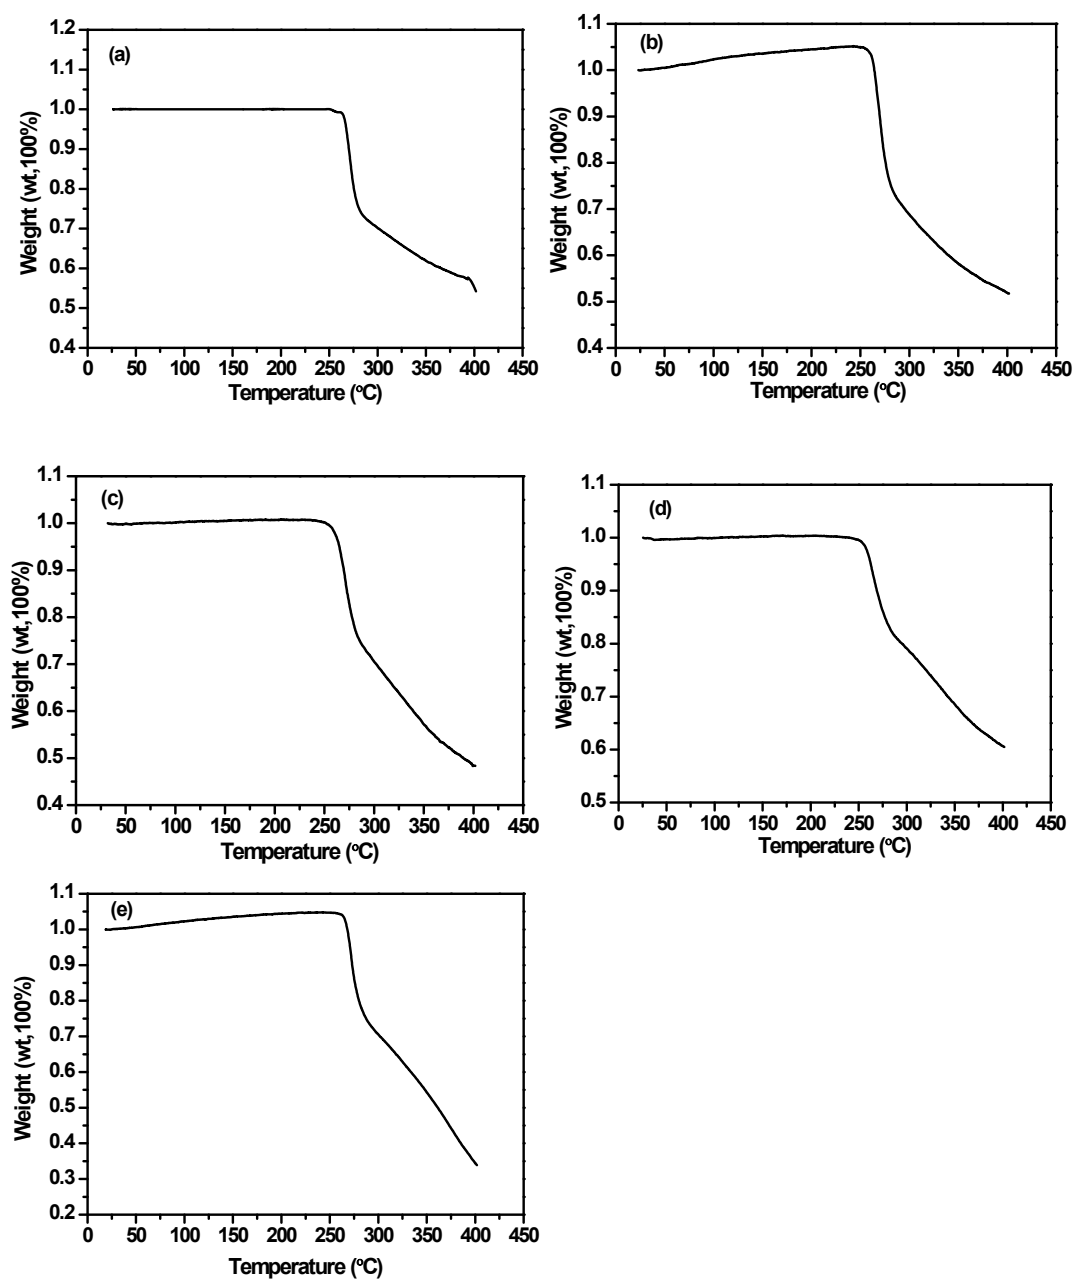

**Figure S3** TGA curve of **1b** (a), **1c** (b), **1d** (c) and **1e** (d) with a heating rate of 10 °C min<sup>-1</sup> under N<sub>2</sub>.

**Table S2** Thermal properties of molecules.

| Temperature | <b>1a</b> | <b>1b</b> | <b>1c</b> | <b>1d</b> | <b>1e</b> |
|-------------|-----------|-----------|-----------|-----------|-----------|
| $T_m$ (°C)  | 142.5     | 131.4     | 130.7     | 130.1     | 129.9     |
| $T_d$ (°C)  | 252.6     | 251.7     | 249.4     | 248.3     | 247.9     |



## 7. SAXS analysis

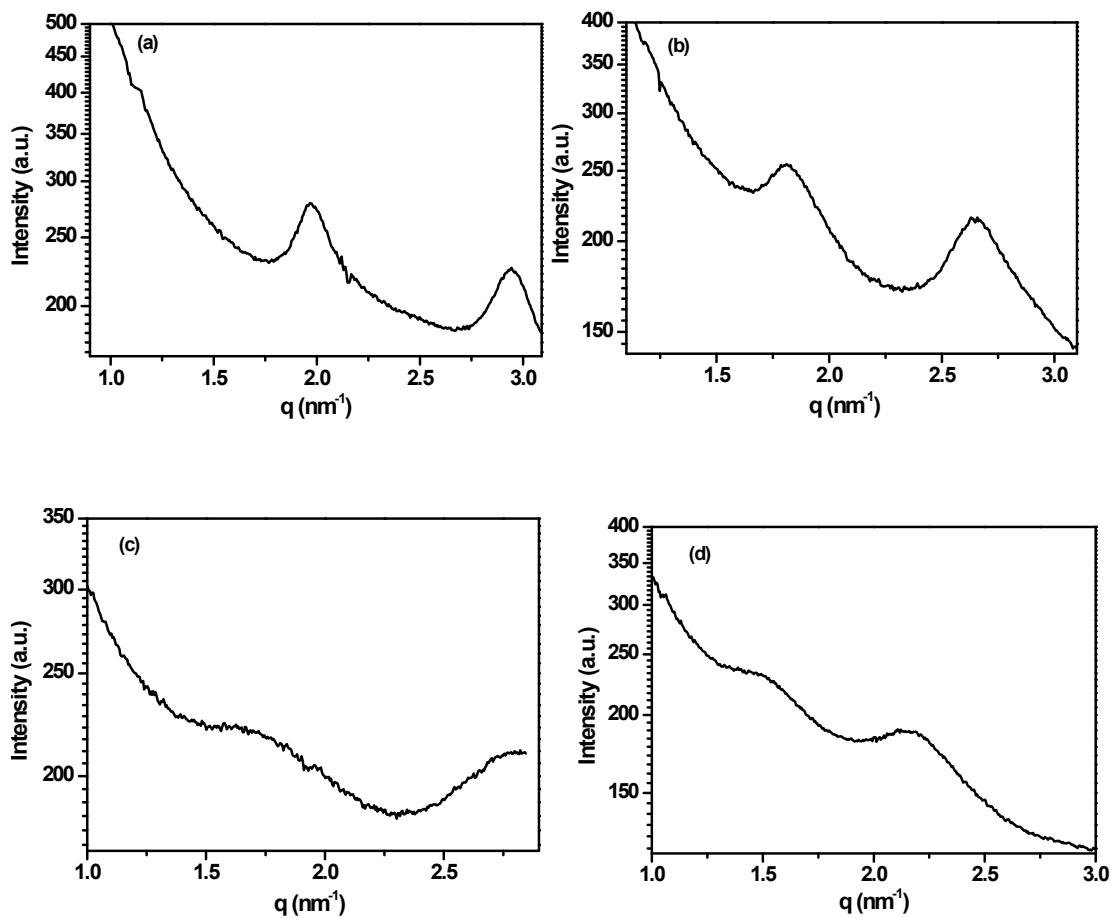

Figure S4 SAXS patterns of xerogel 1a (a) and 1a/TCNQ (mole ratio = 1:1, b) from MCH; xerogel 1b (c) and 1b/TCNQ (mole ratio = 1:1, d) from cyclohexane.

## 8. FT-IR Spectra

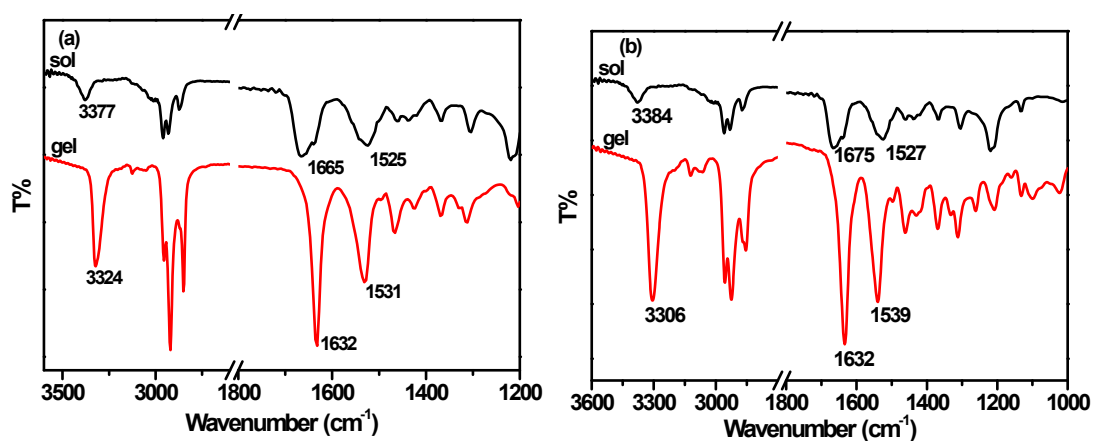

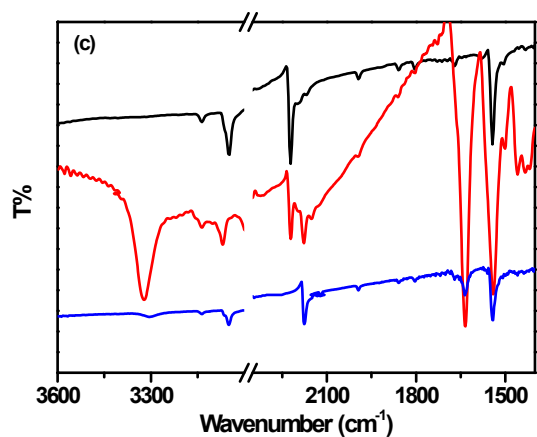

**Figure S5** FT-IR spectra of (a) **1a** in  $\text{CHCl}_3$  solution ( black) and xerogel from MCH ( red); (b) **1b** in  $\text{CHCl}_3$  solution ( black) and xerogel from cyclohexane ( red); (c) the CT complex xerogel of **1a** with TCNQ (1: 1) from MCH (red) and **1b** with TCNQ (1: 1) from cyclohexane (blue).

## 9. $^1\text{H}$ NMR spectra of **1a**

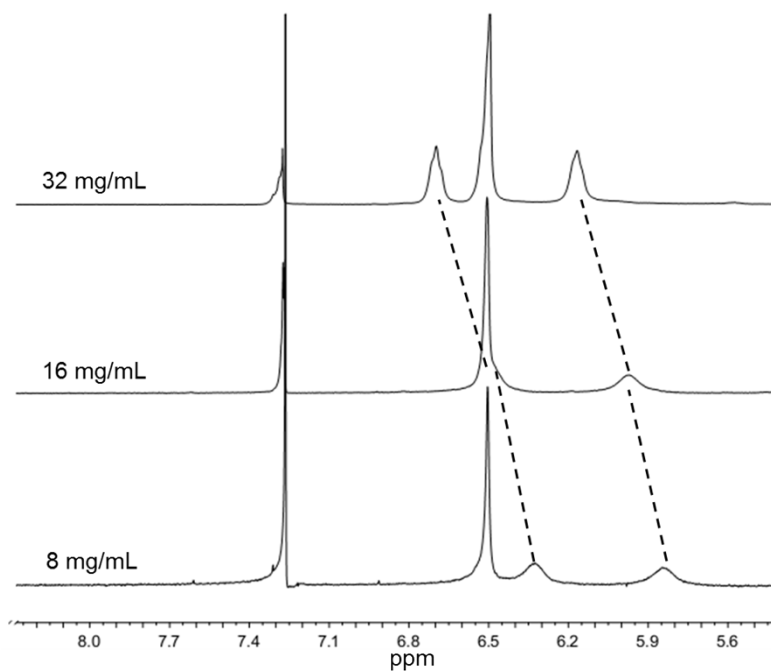

**Figure S6** Variable-concentration  $^1\text{H}$ -NMR spectra of **1a** in  $\text{CDCl}_3$ .

## 10. Oxidation Potentials

**Table S3** Half-Wave Oxidation Potentials (V).

| Properties               | TCNQ     |          |       | TTF      |          |
|--------------------------|----------|----------|-------|----------|----------|
|                          | $E_{ox}$ | $E_{ox}$ | $E$   | $E_{ox}$ | $E_{ox}$ |
|                          | (V)      | (V)      | (V)   | (V)      | (V)      |
| <b>1a</b> in cyclohexane | ---      | ---      | ---   | 0.564    | 0.931    |
| Cyclohexane gel          | ---      | ---      | ---   | 0.513    | 0.885    |
| CT complex gel           | -0.713   | -0.206   | 0.355 | 0.524    | 0.837    |
| Solution of TCNQ         | -0.767   | -0.3     | 0.269 | ---      | ---      |

## 11. CV curves

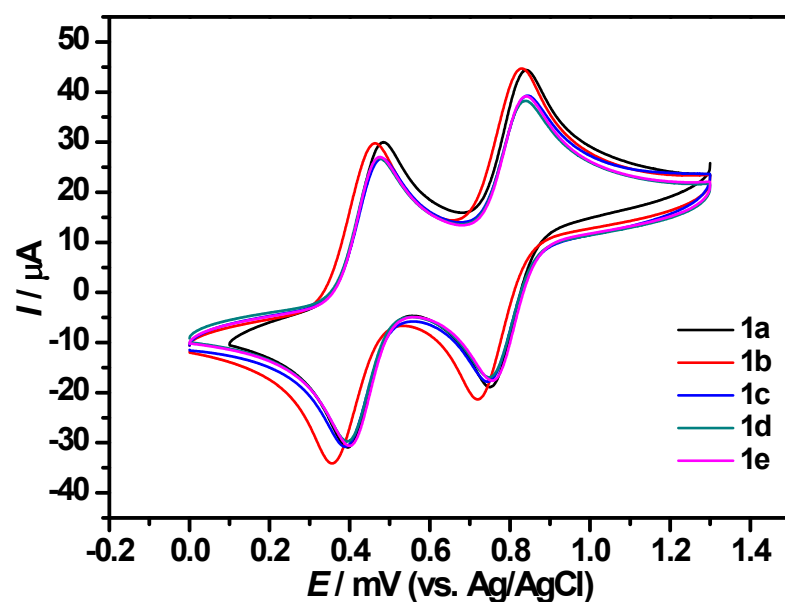

**Figure S7** Cyclic voltammograms and differential pulse voltammetry (inset) of compounds **1a-c** ( $1 \times 10^{-3}$  M) in  $\text{CH}_2\text{Cl}_2\text{-CH}_3\text{CN}$  (1:1, v/v) containing 0.1 M  $\text{Bu}_4\text{NPF}_6$ . Scan rate was  $100 \text{ mV s}^{-1}$ .

## 12. FT-IR spectra of addition of I<sub>2</sub>

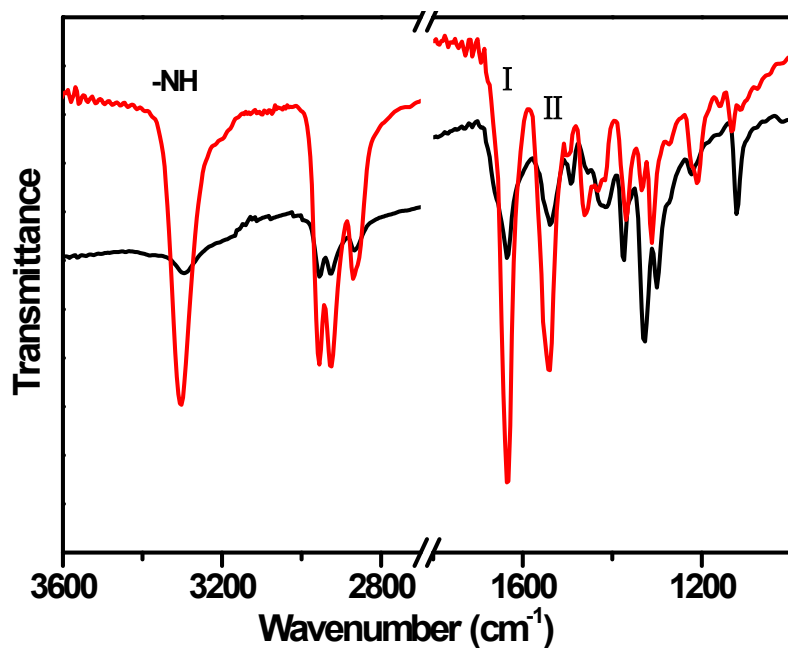

Figure S8 FT-IR spectra of xerogel 1a (red line) and after addition of iodine (black line).

## 13. Colorimetric changes of redox reactions

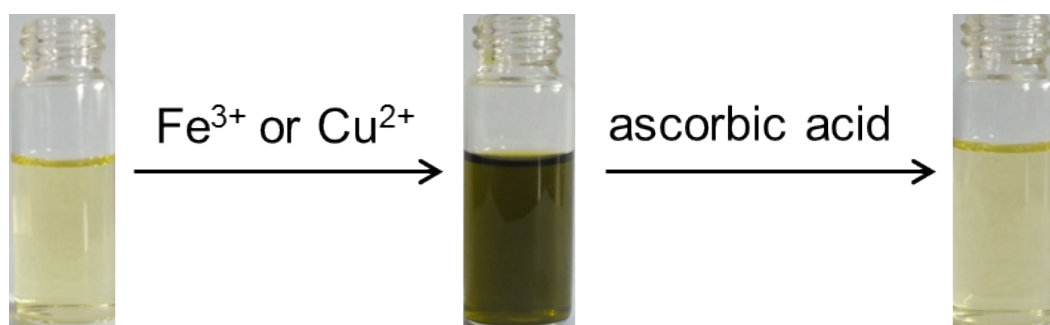

Figure S9 Colorimetric changes of 1a (10<sup>-4</sup> M) in ethanol by chemical redox process.

#### 14. oxidants-responsive properties of CT complex gel

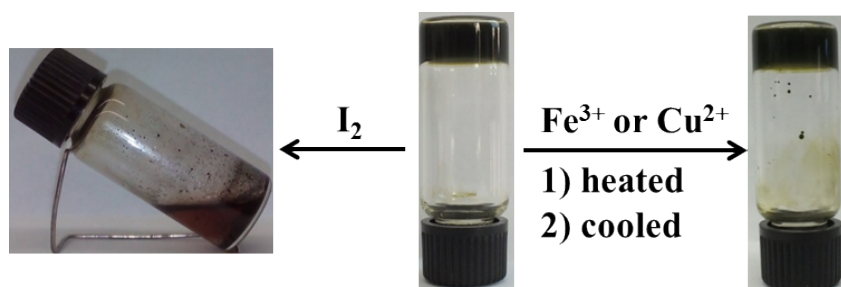

Figure S10 oxidants-responsive properties of CT complex gel of **1a** and TCNQ.

#### 15. UV-vis spectra of $Fe^{3+}/Cu^{2+}$ —Vc Sensitive

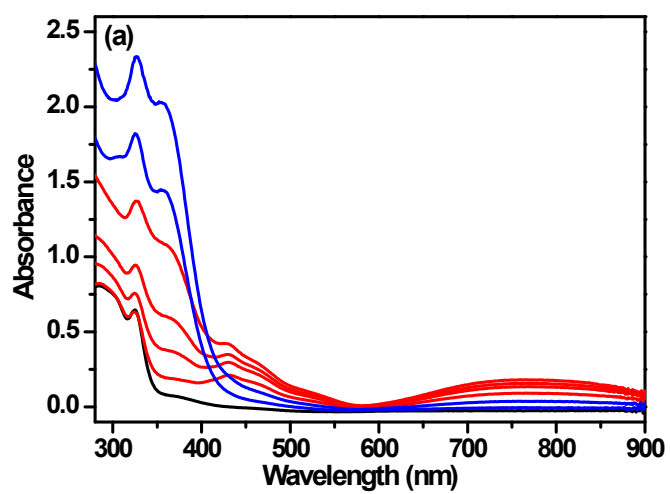

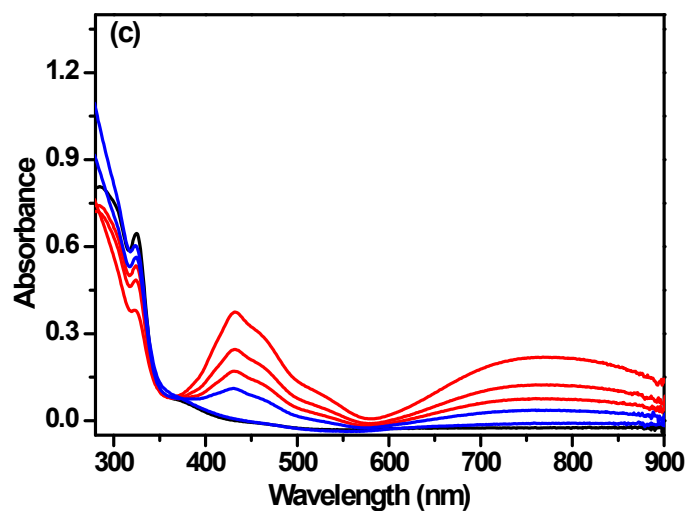

**Figure S11** UV-vis absorption spectra of **1a** ( $5 \times 10^{-5} \text{M}$ ) during chemical oxidation by successive addition of (a)  $\text{FeCl}_3$  (0~6 eq. red line) (b)  $\text{Cu}(\text{ClO}_4)_2$  (0~8 eq. red line) and reduction by addition of ascorbic acid (2~6 eq. and 2~100 eq., respectively, blue line) in ethanol.

## 16. Gel-sol transition by adding TFA

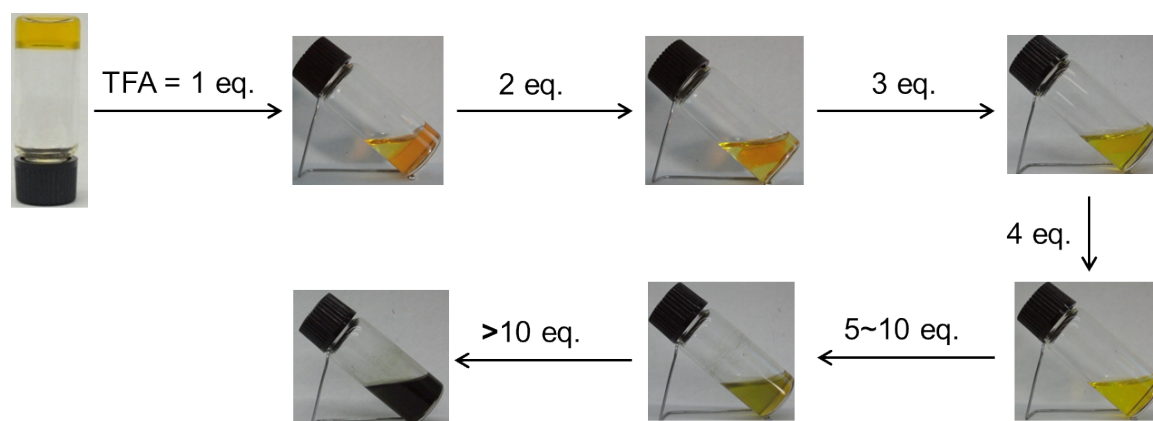

**Figure S12** Schematic of gel transformation after addition of TFA (0~3 eq.) in cyclohexane.

## 17. Gel-sol transition by $\text{CH}_3\text{COOH}/\text{HCOOH}$ -TEA stimuli

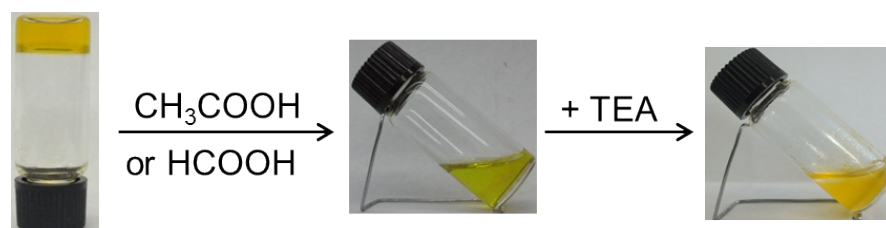

**Figure S13** The irreversible gel-sol transitions of organogel (**1a**/cyclohexane) triggered by  $\text{CH}_3\text{COOH}/\text{HCOOH}$ -TEA stimuli.

## 18. ESI-MS spectra of TFA with 1a

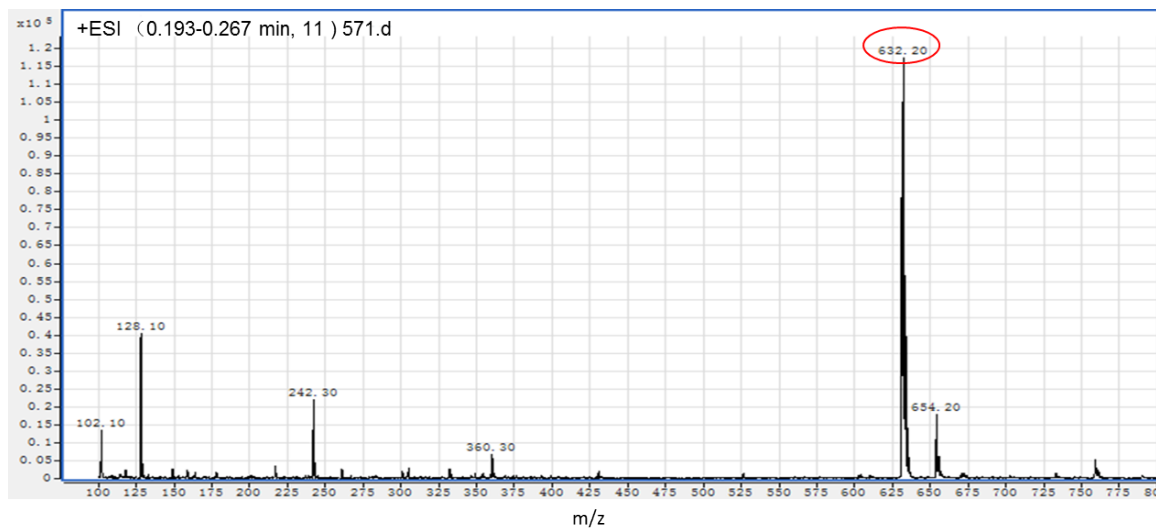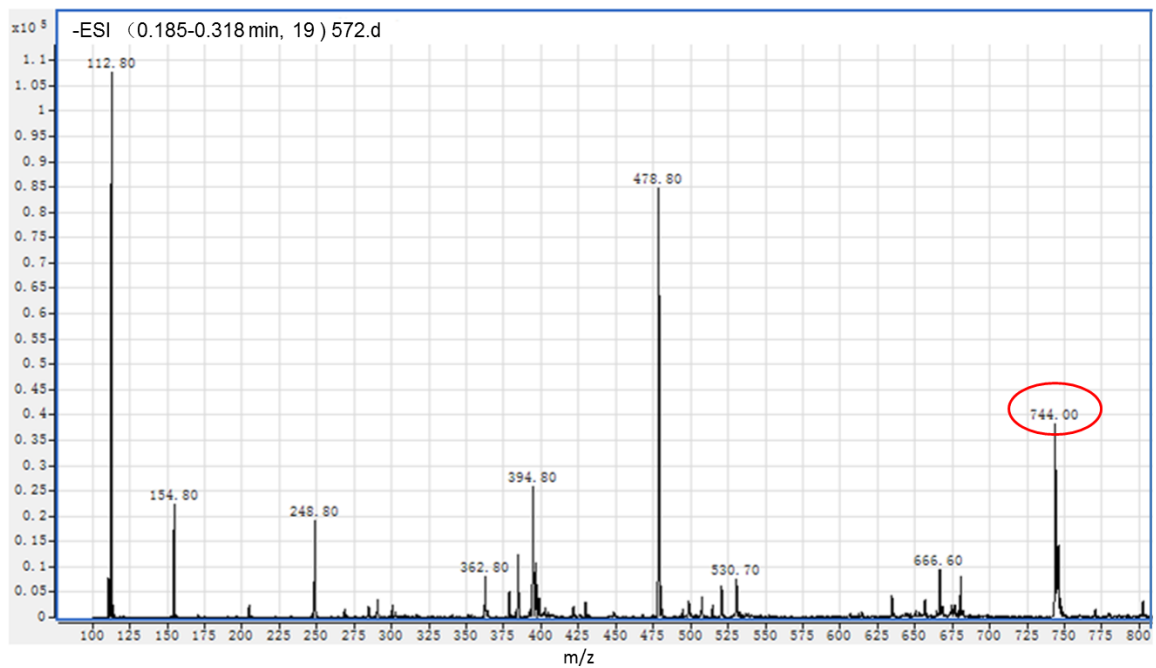

Figure S14 ESI-MS spectra of 1a after addition of 10 equiv. TFA in CHCl<sub>3</sub>.

## 19. UV-vis spectra of TFA-TEA Sensitive

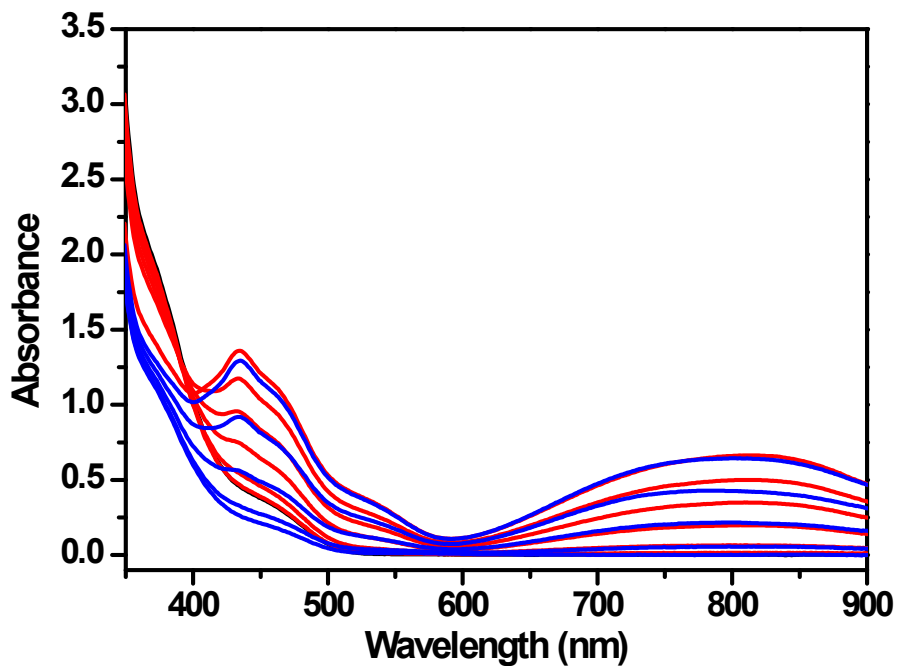

**Figure S15** UV-vis absorption spectra of **1a** ( $10^{-4}$  M) before (black line) and after successive addition of TFA (1~20 eq. red line), then titration TEA (1~ 60 eq. blue line) in  $\text{CHCl}_3$  solution.

## 20. Gel-sol transition of CT complex gel by adding TFA-TEA

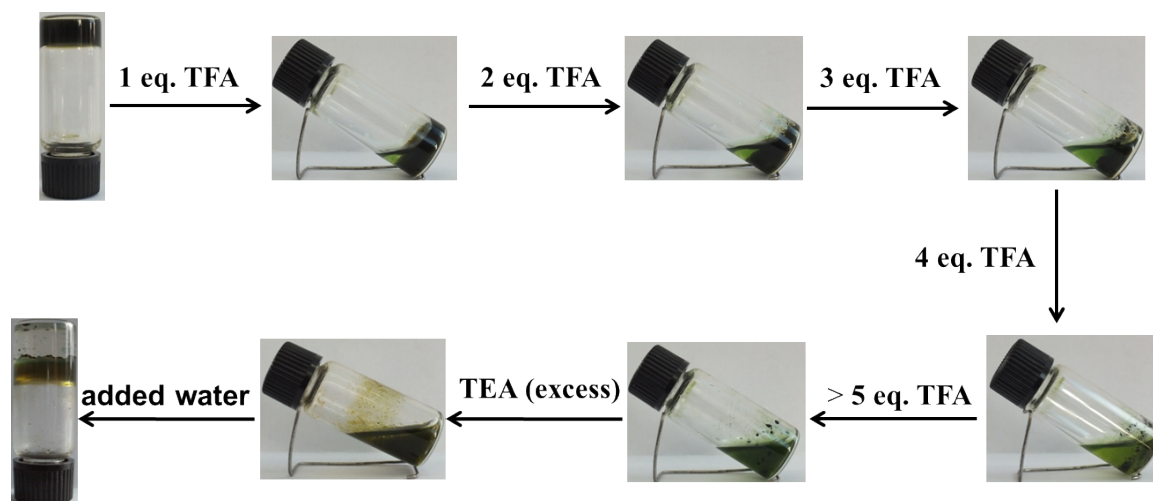

**Figure S16** Schematic of CT complex gel of **1a** and TCNQ transformation after addition of TFA and TEA in cyclohexane.

## 21. Colorimetric changes by TFA-TEA stimuli



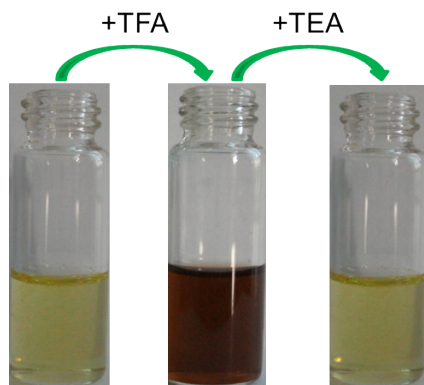

**Figure S17** Colorimetric changes of **1a** ( $10^{-4}$  M) in  $\text{CHCl}_3$  by TFA-TEA stimuli.

## 22. $^1\text{H}$ , $^{13}\text{C}$ NMR and MALDI-TOF-MS Spectra

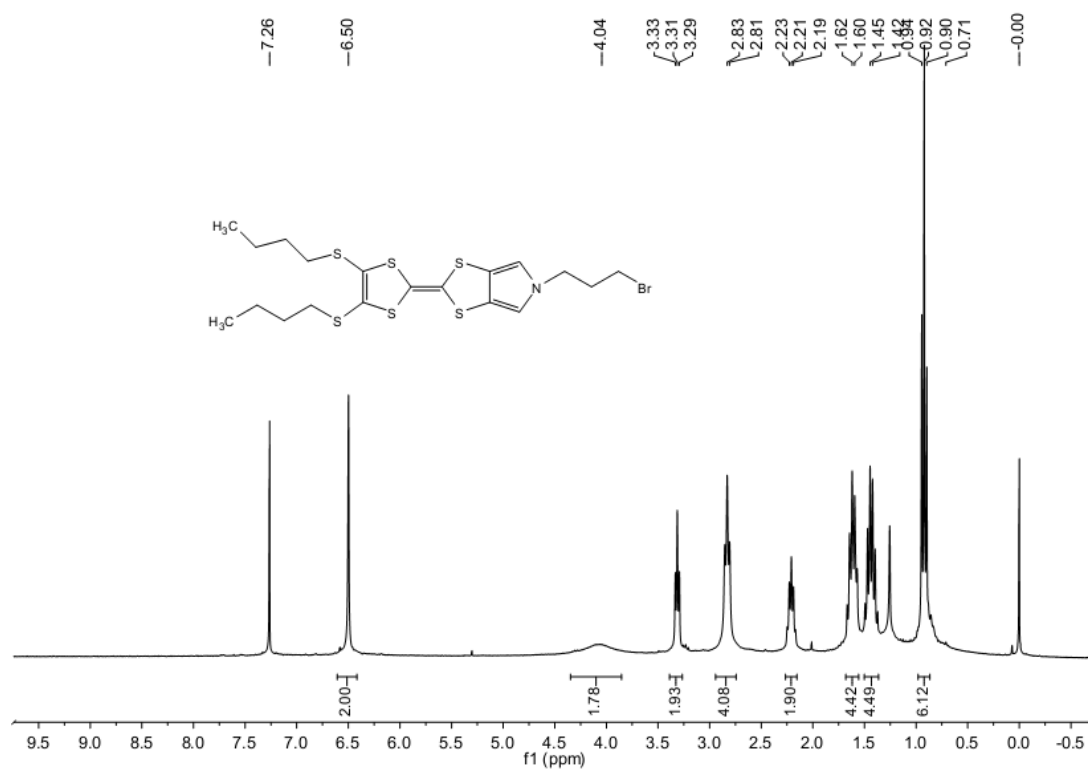

**Figure S18**  $^1\text{H}$  NMR spectra of compound **5**

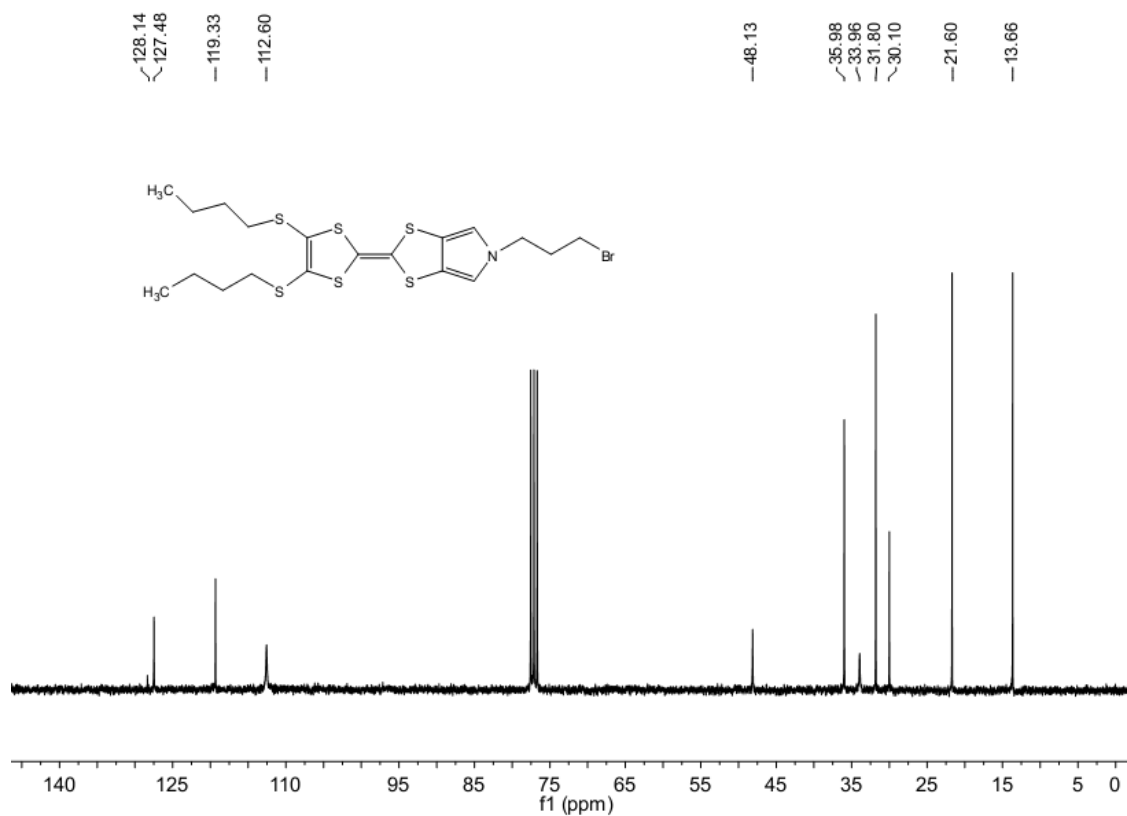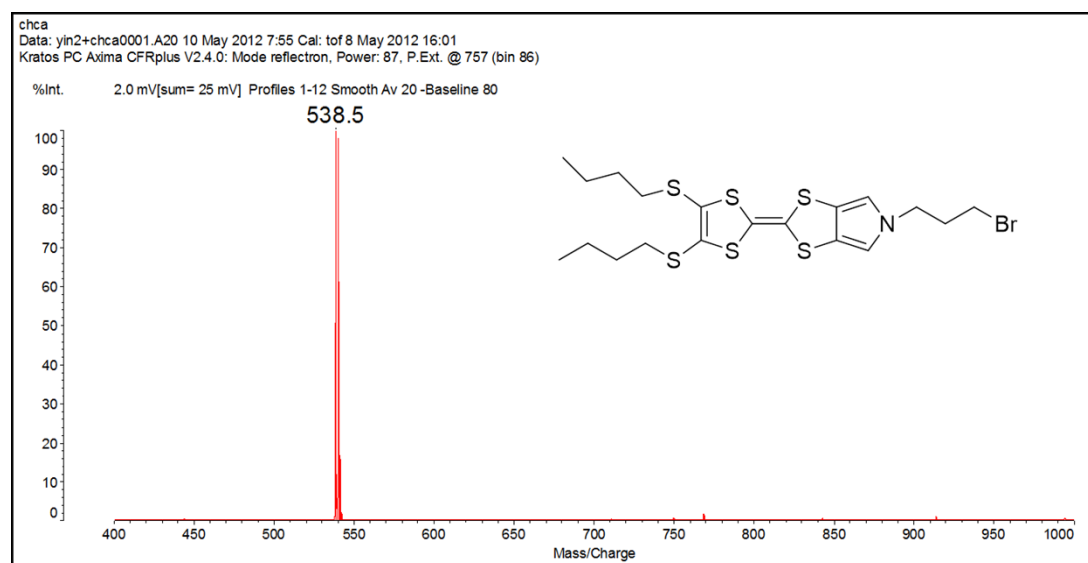

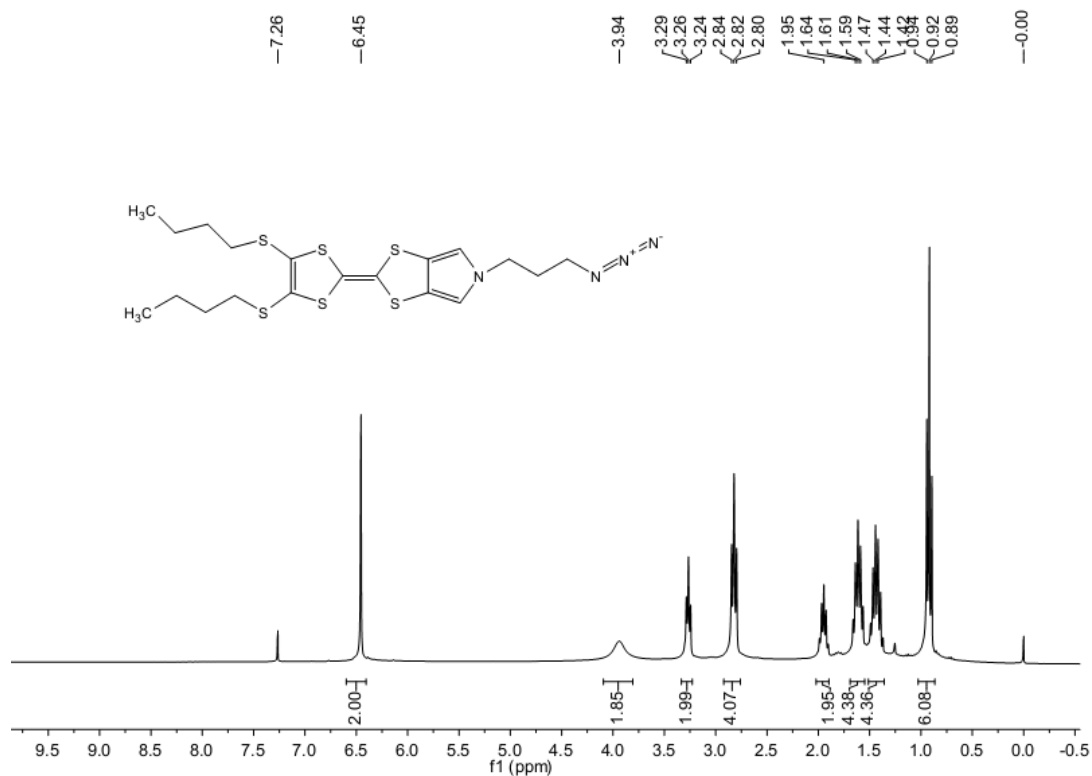

Figure S21 <sup>1</sup>H NMR spectra of compound 4

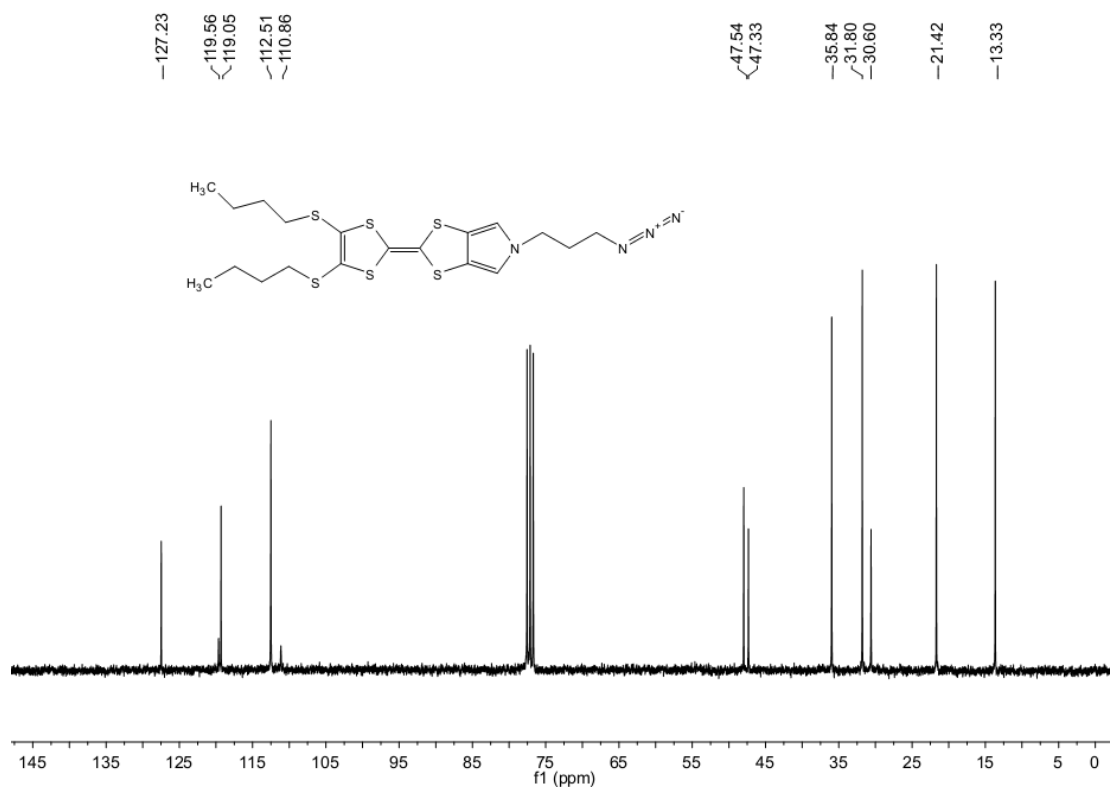

Figure S22 <sup>13</sup>C NMR spectra of compound 4

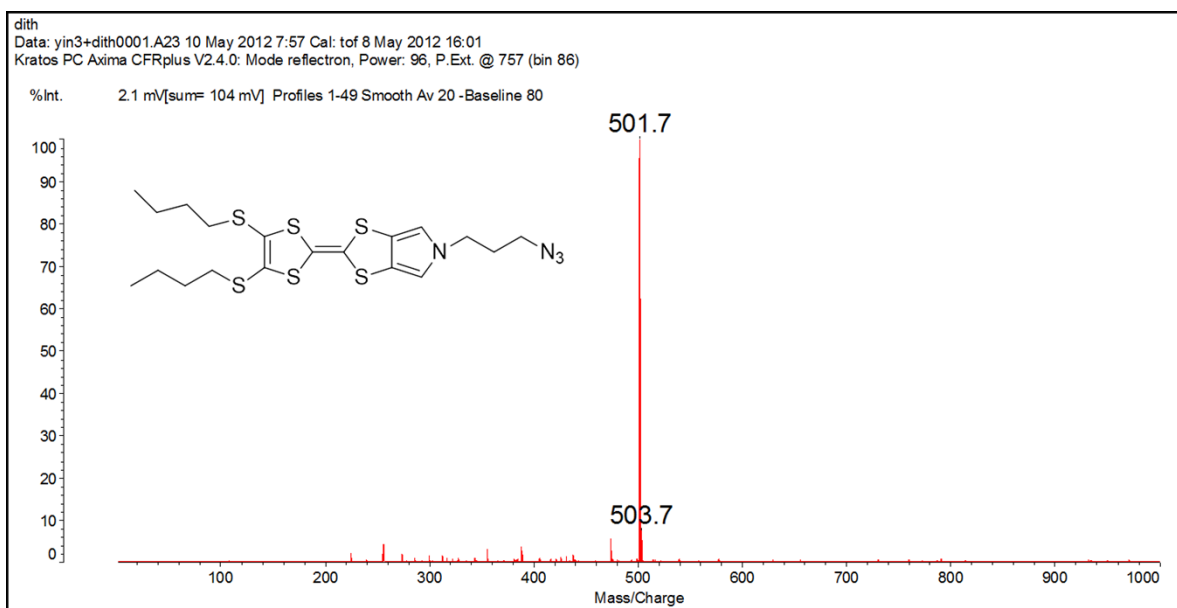

**Figure S23** MALDI-TOF-MS spectra of compound **4**

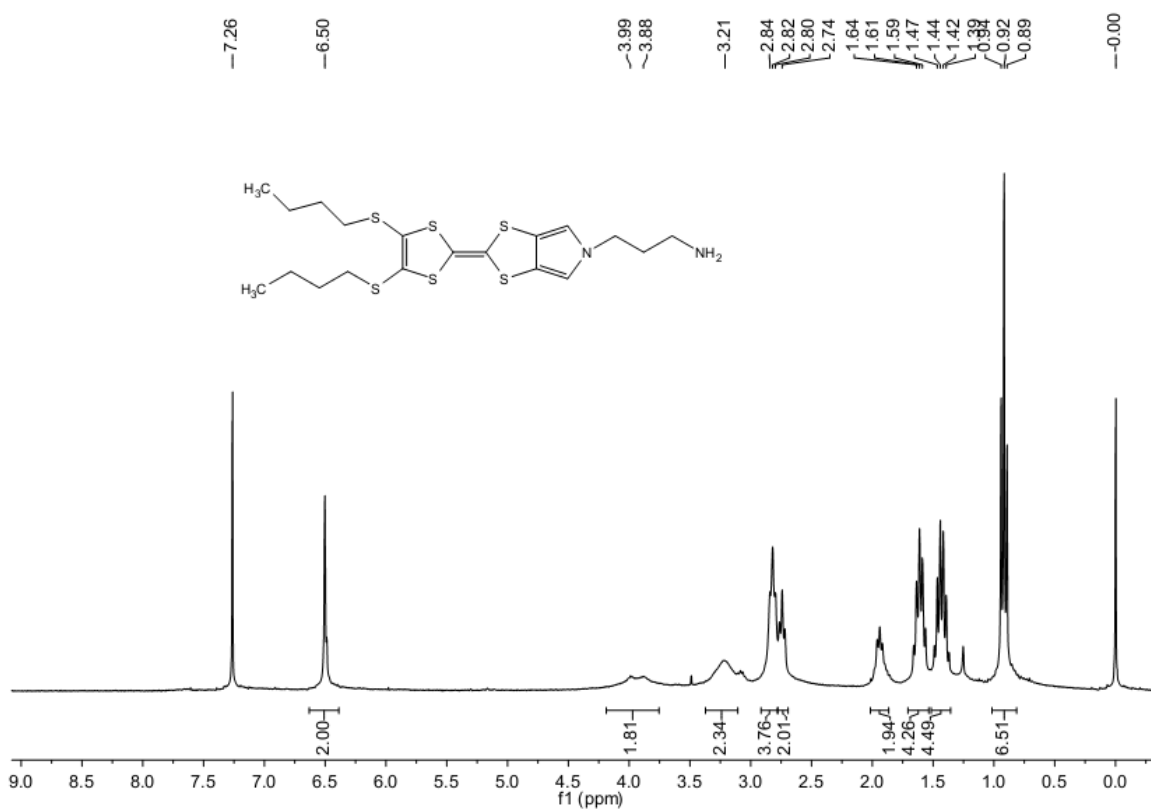

**Figure S24** <sup>1</sup>H NMR spectra of compound **3**

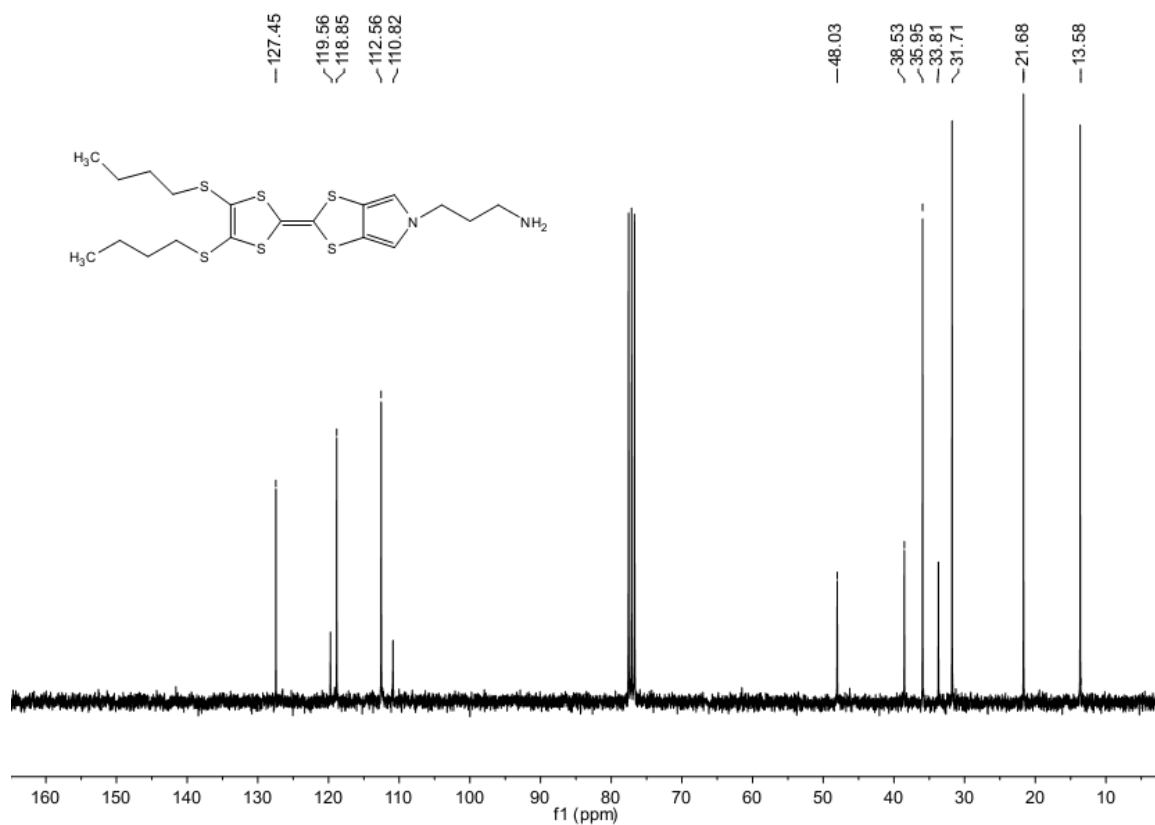

Figure S25 <sup>13</sup>C NMR spectra of compound 3

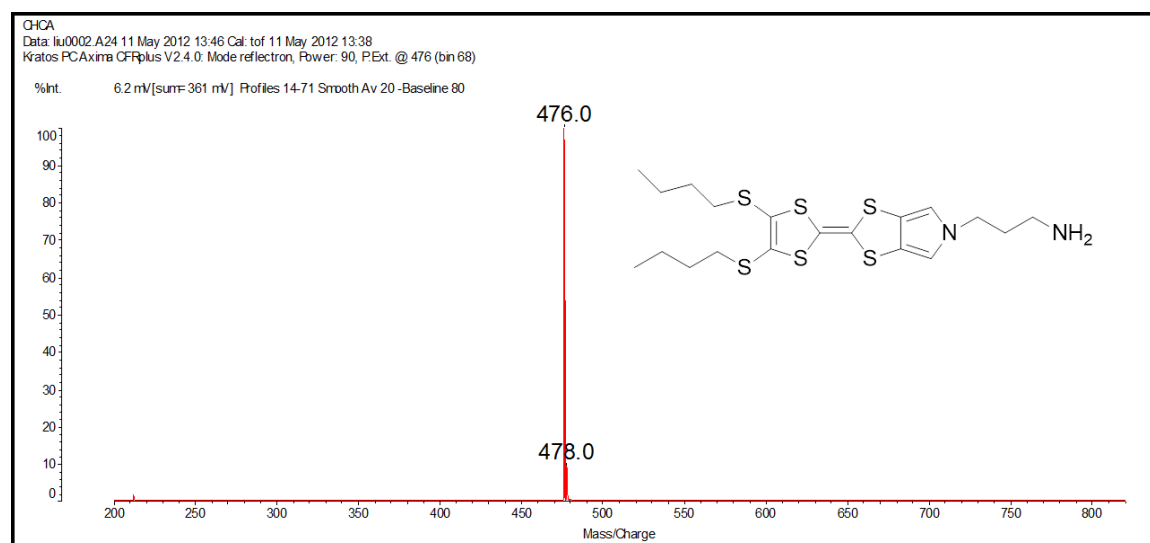

Figure S26 MALDI-TOF-MS spectra of compound 3

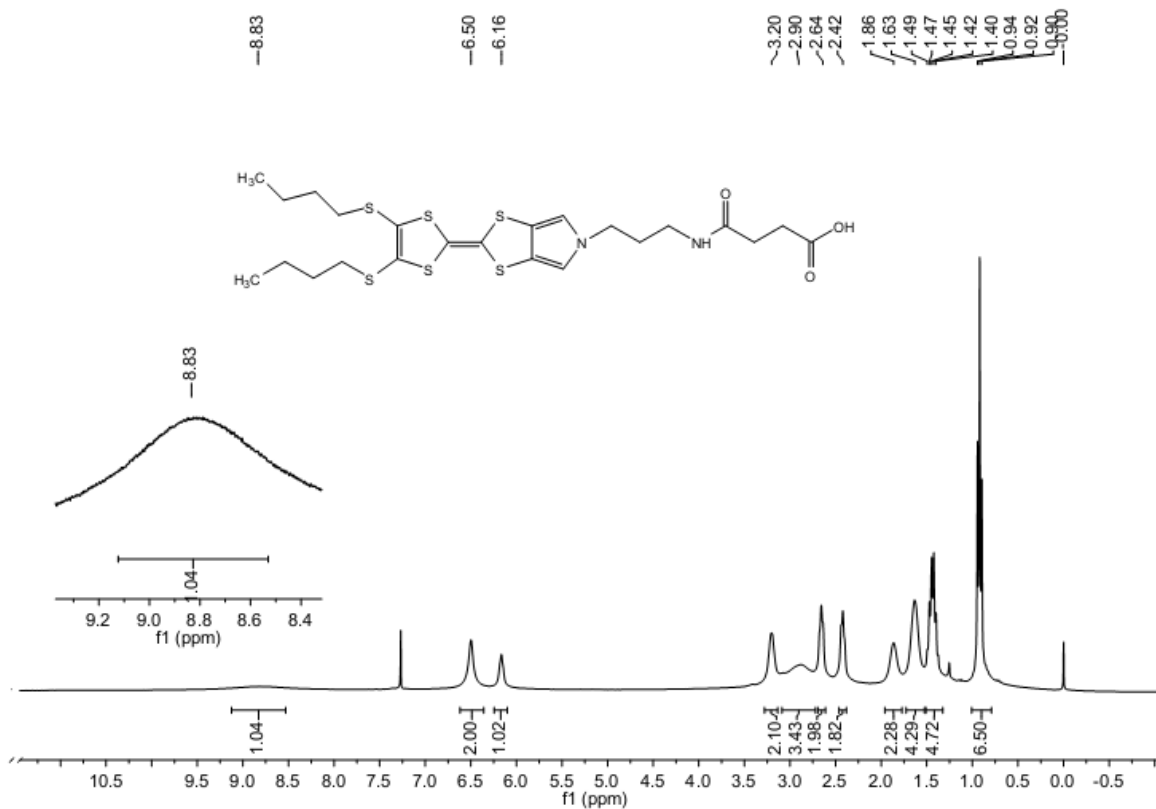

Figure S27 <sup>1</sup>H NMR spectra of compound 2

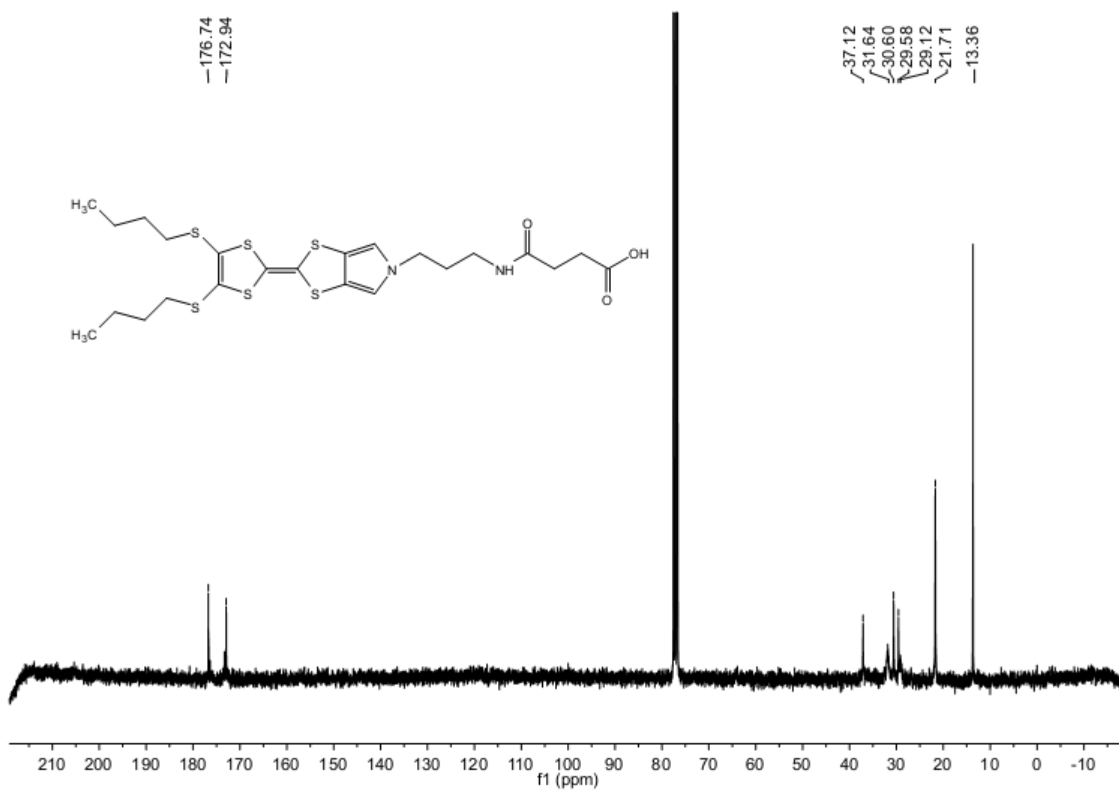

Figure S28 <sup>13</sup>C NMR spectra of compound 2

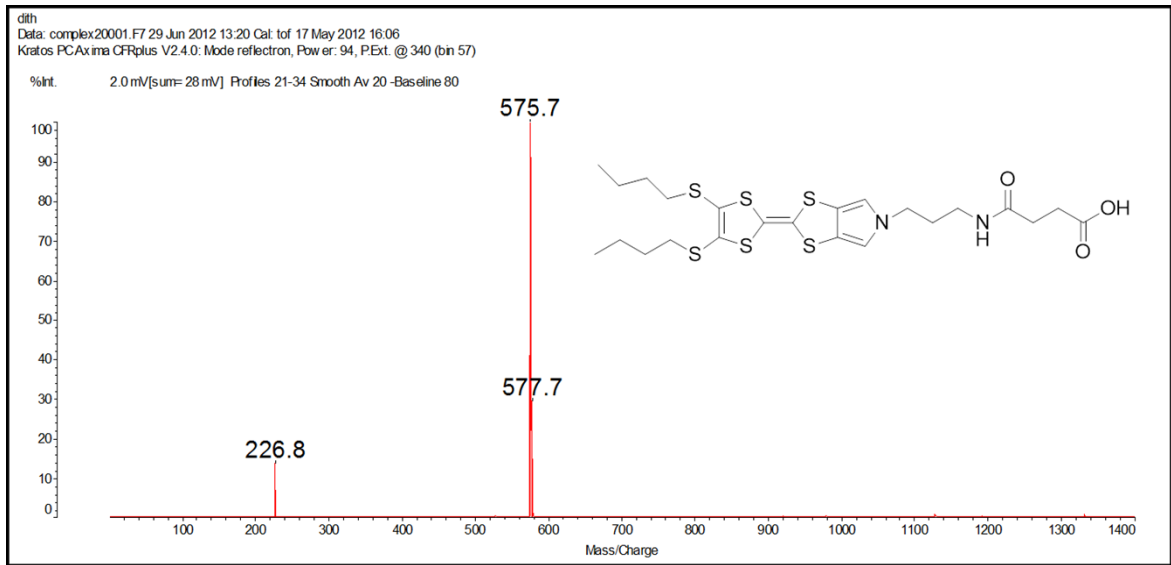

Figure S29 MALDI-TOF-MS spectra of compound 2

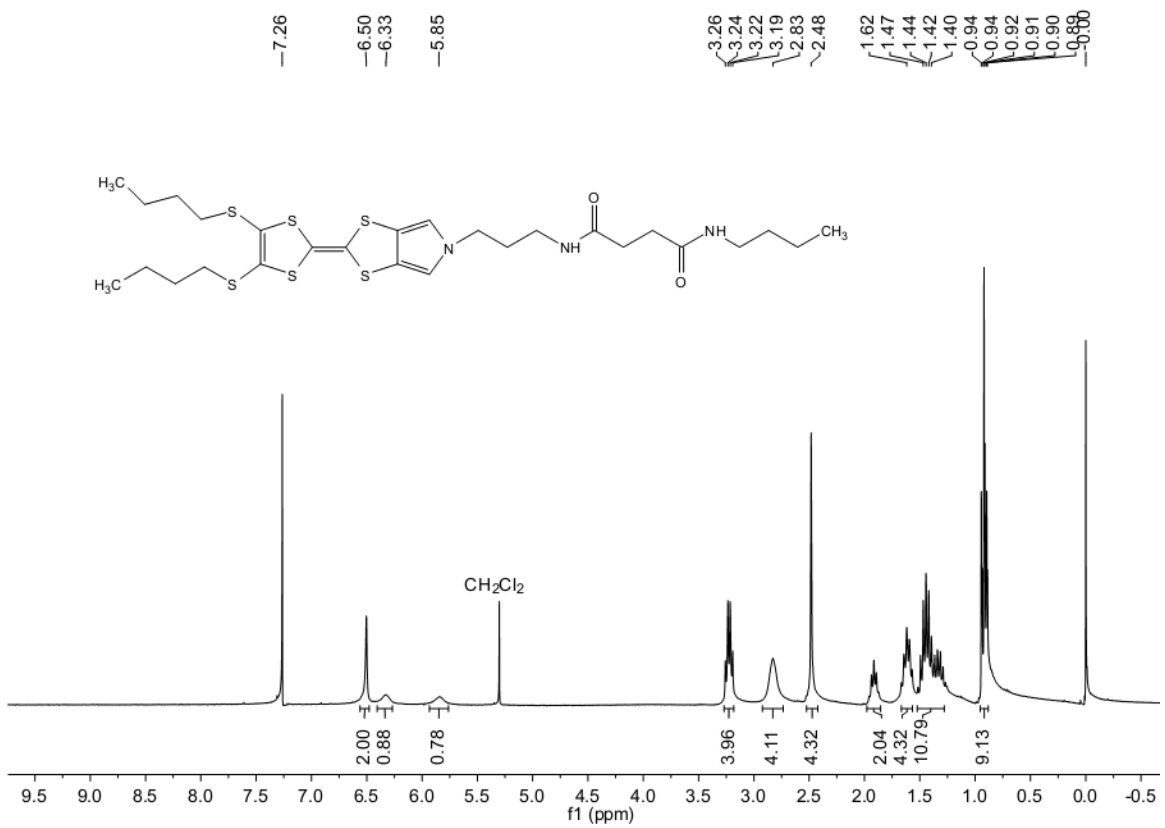

Figure S30 <sup>1</sup>H NMR spectra of compound 1a

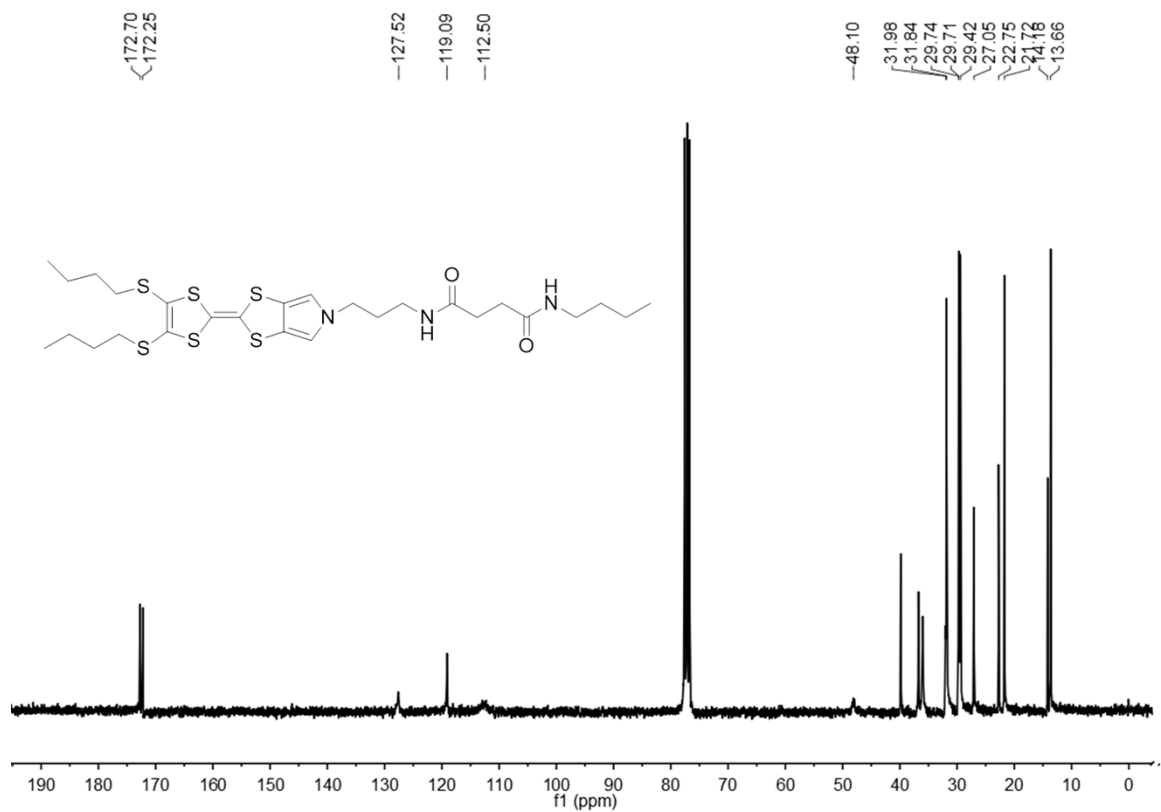

Figure S31 <sup>13</sup>C NMR spectra of compound 1a

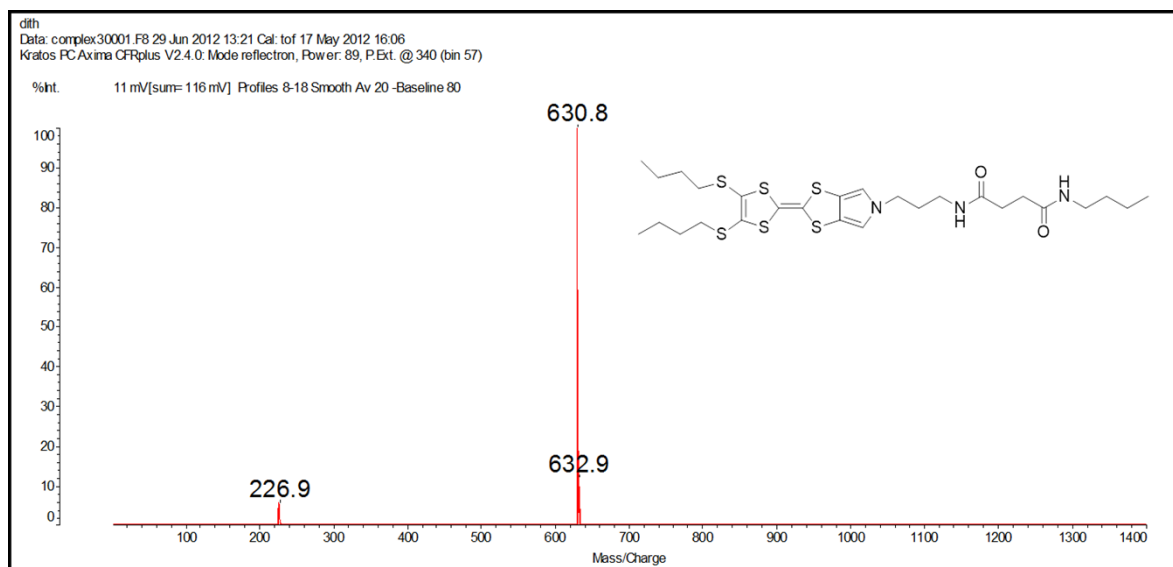

Figure S32 MALDI-TOF-MS spectra of compound 1a





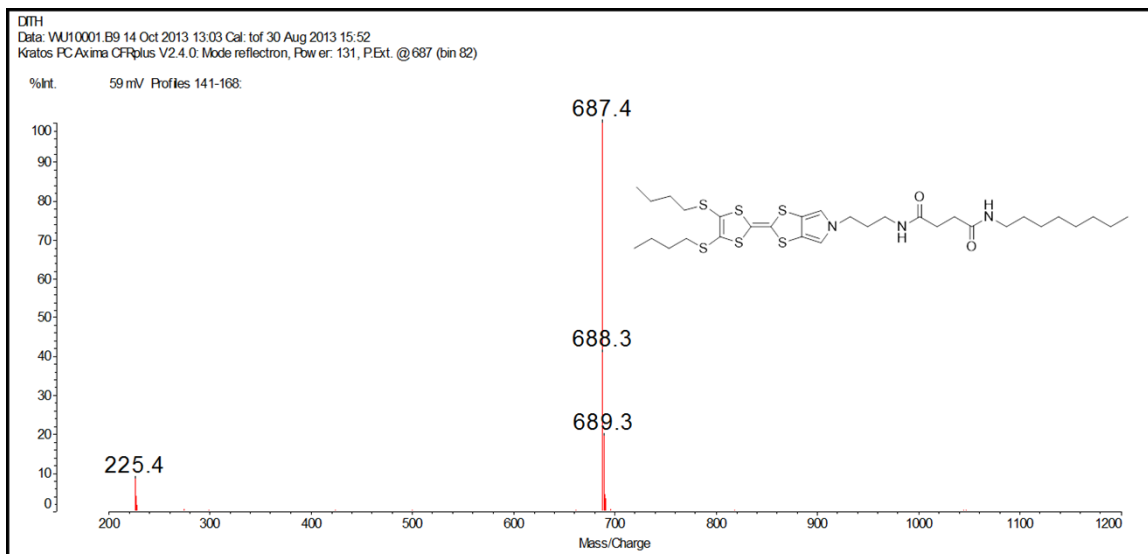

**Figure S35** MALDI-TOF-MS spectra of compound **1b**

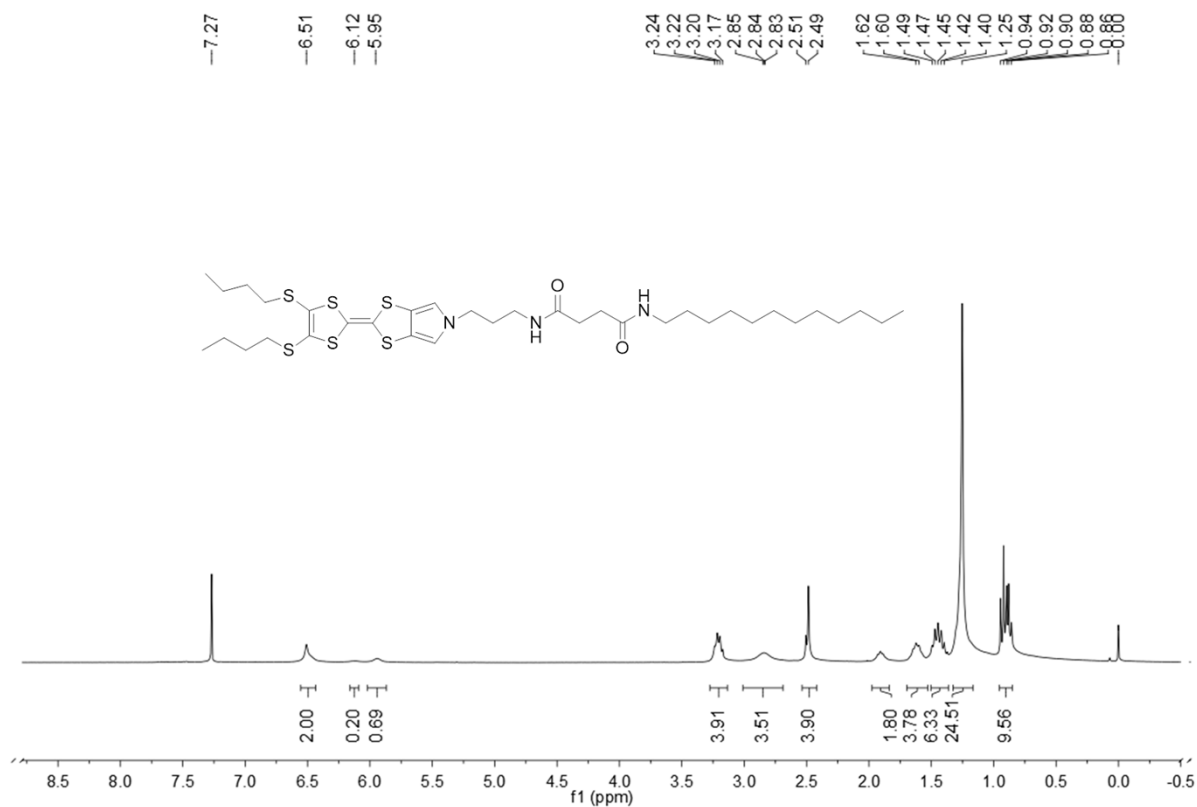

**Figure S36**  $^1\text{H}$  NMR spectra of compound **1c**

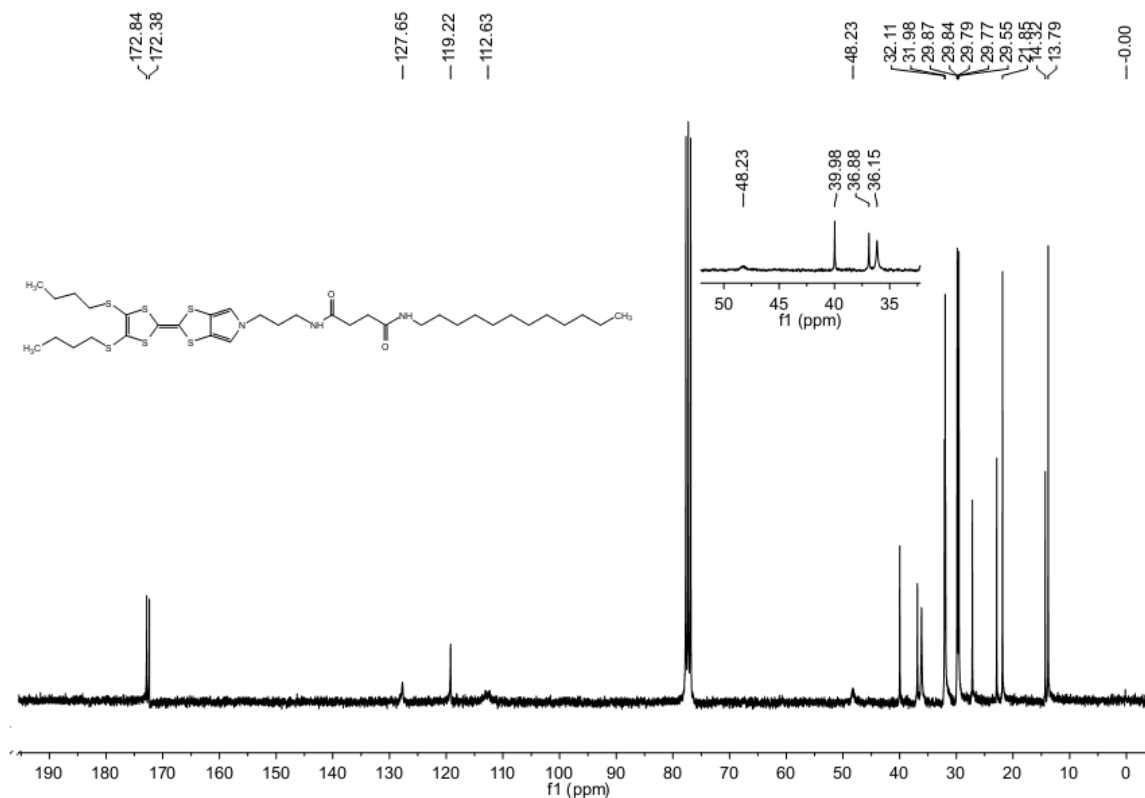

Figure S37 <sup>13</sup>C NMR spectra of compound 1c

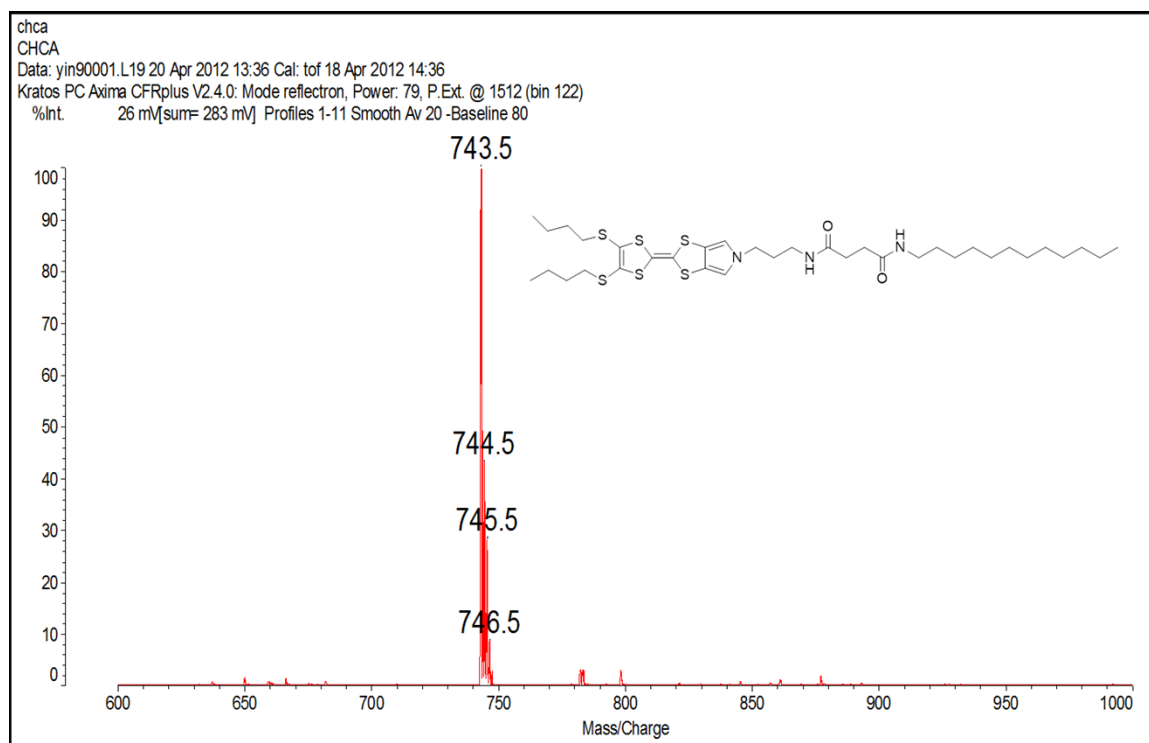

Figure S38 MALDI-TOF-MS spectra of compound 1c

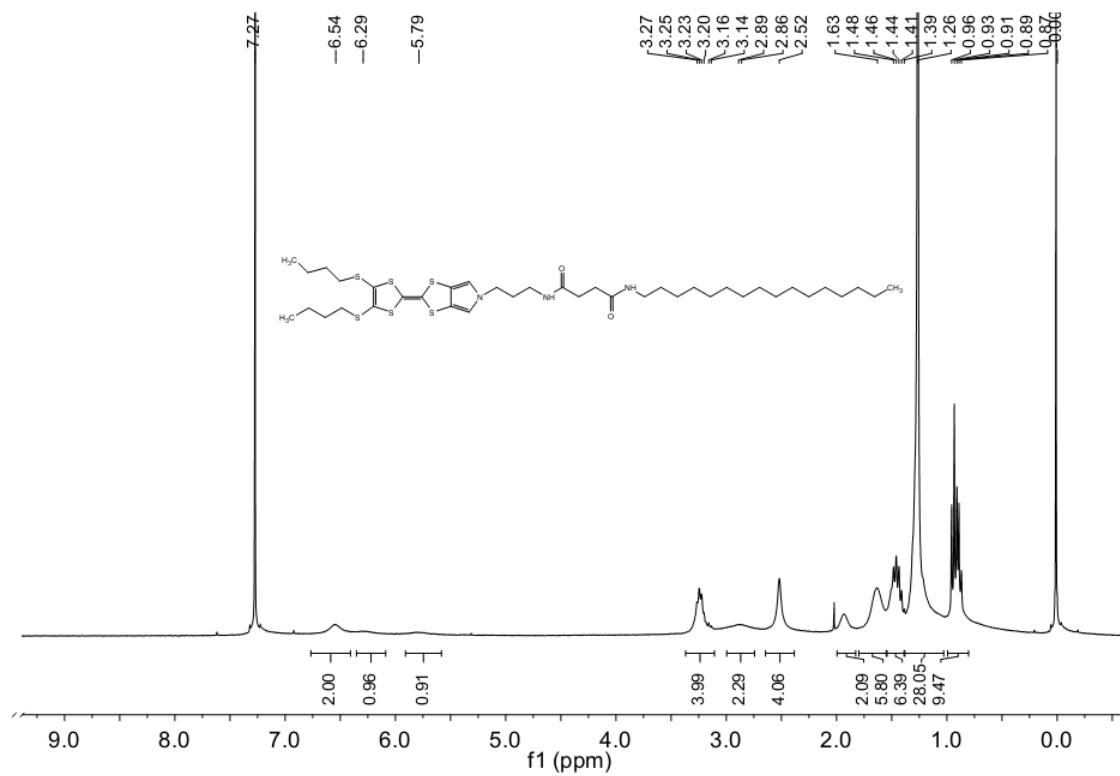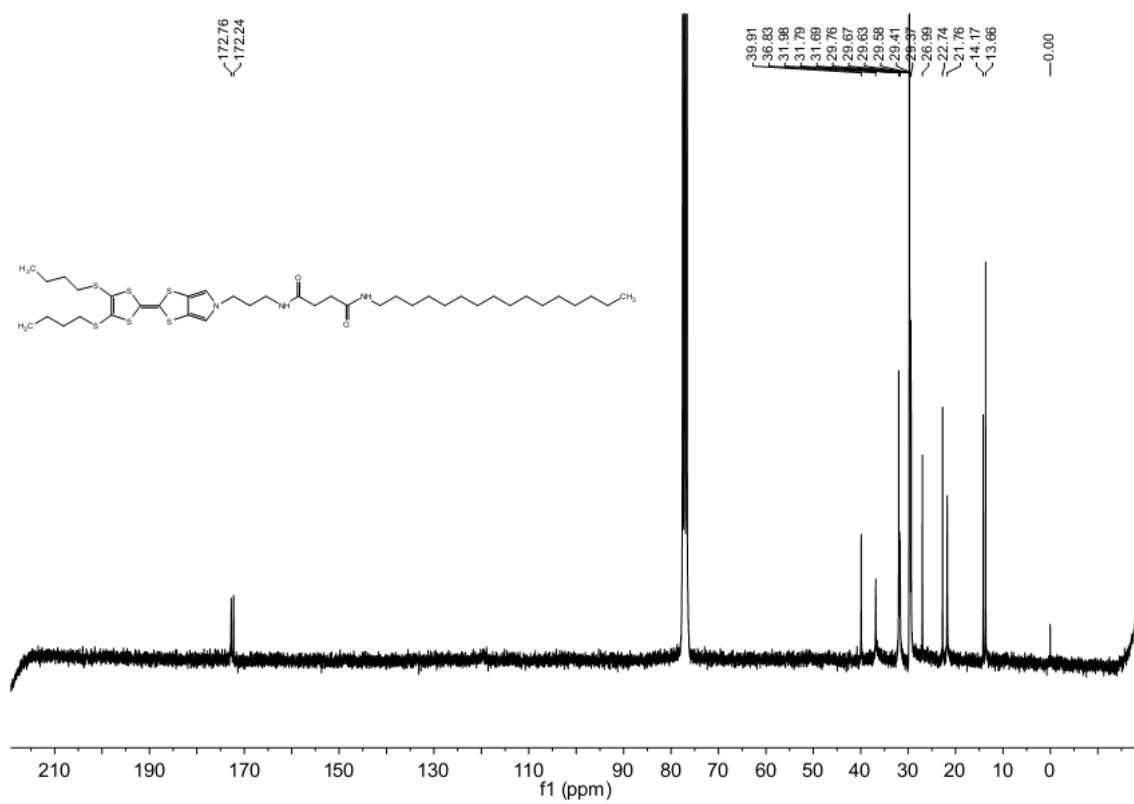

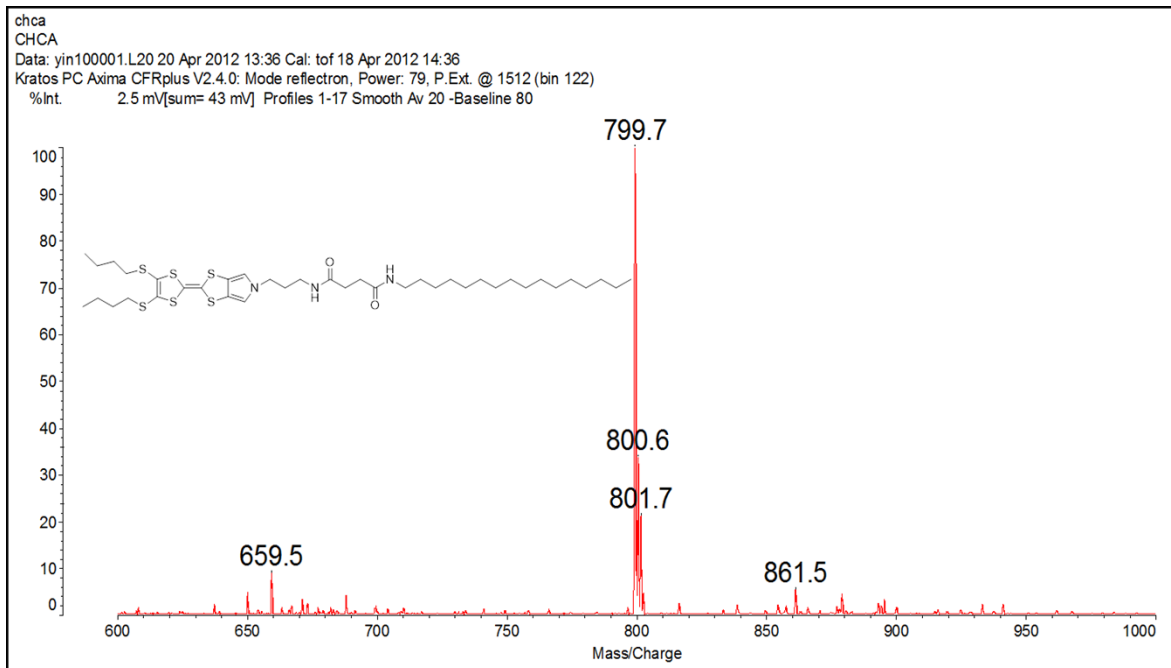

**Figure S41** MALDI-TOF-MS spectra of compound **1d**

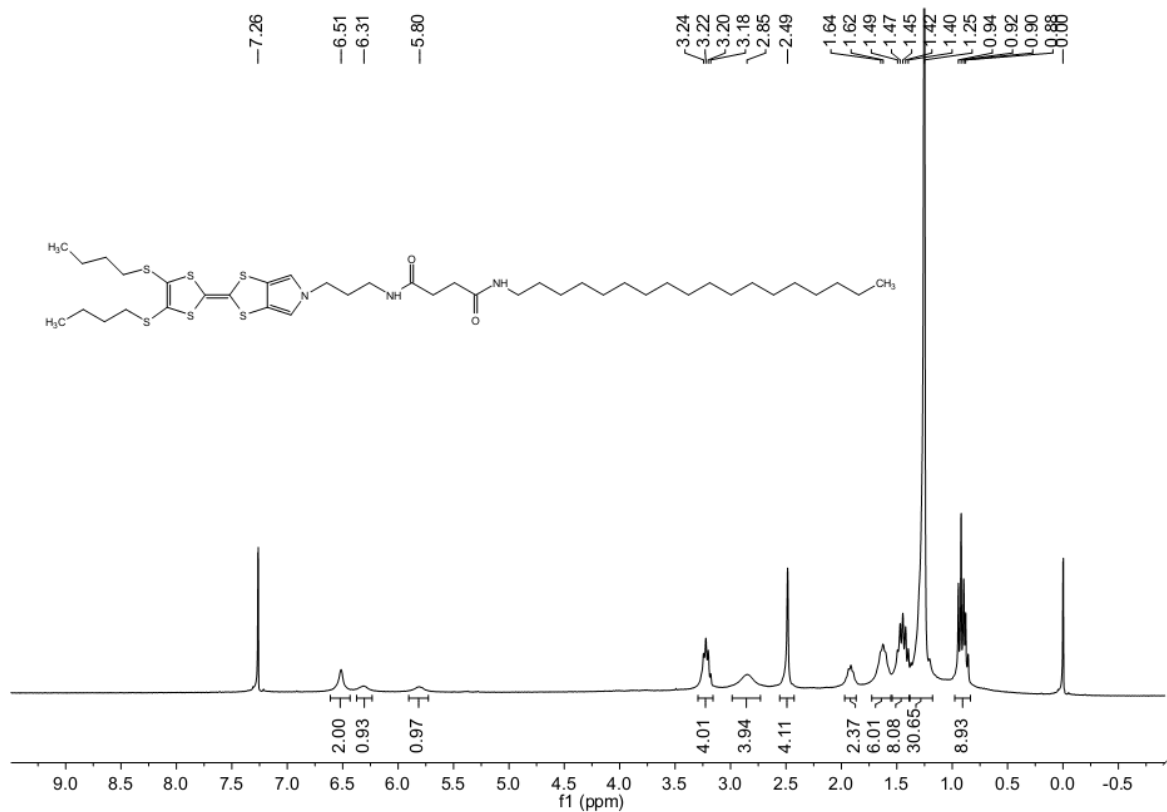

**Figure S42**  $^1\text{H}$  NMR spectra of compound **1e**

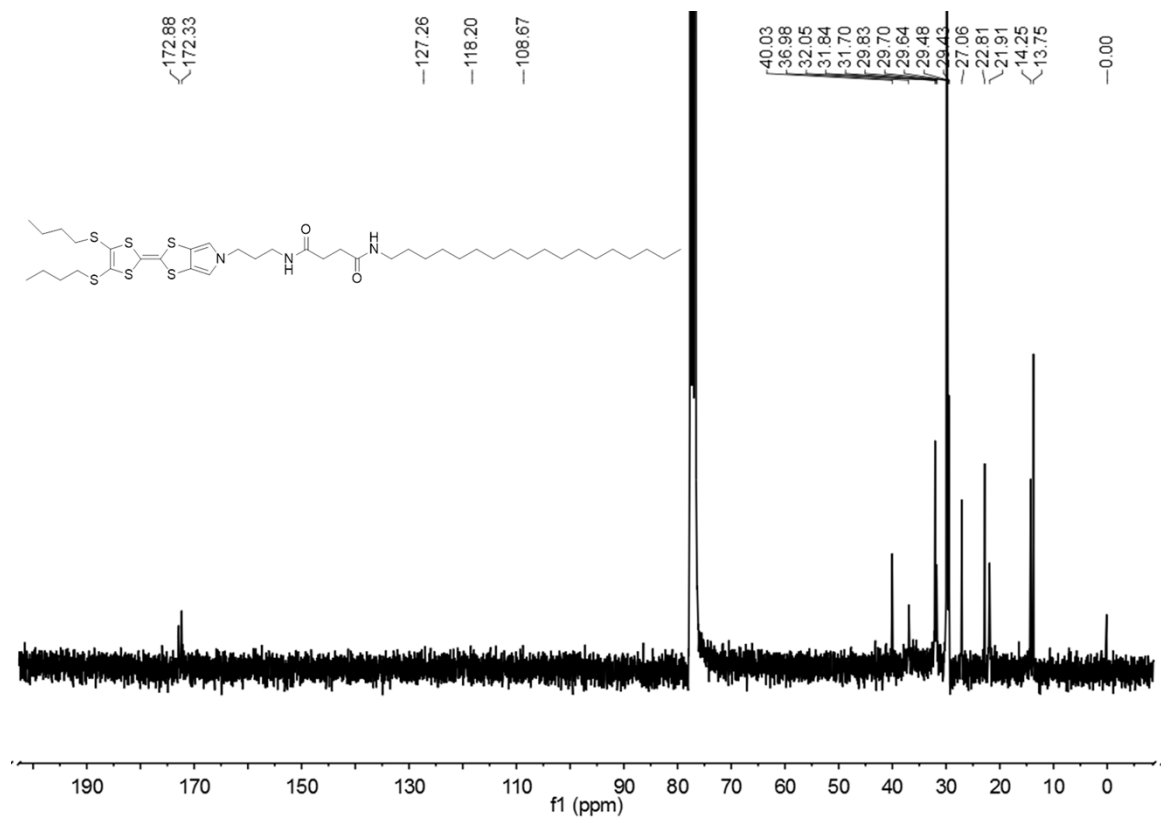

**Figure S43** <sup>13</sup>C NMR spectra of compound **1e**

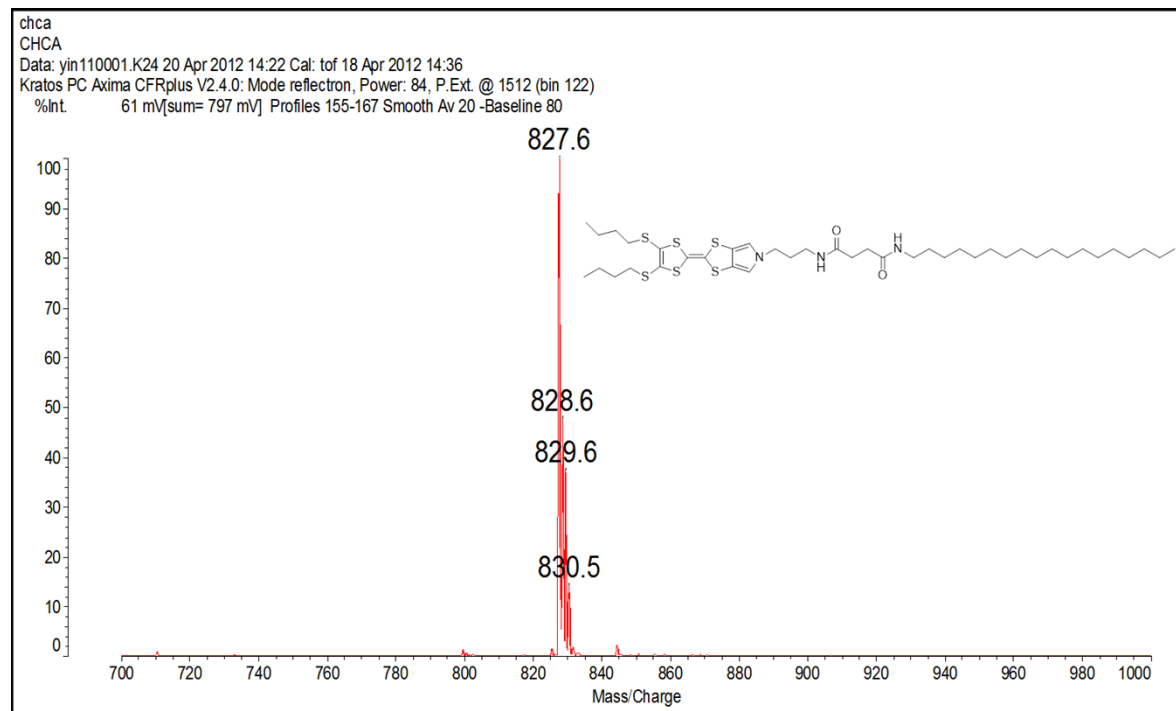

**Figure S44** MALDI-TOF-MS spectra of compound **1e**
